# Supplementary material for: Rapid biocompatible macrocyclization of peptides with decafluoro-diphenylsulfone
Source: PubMed Central journal article supplement — Chem Sci. 2016 Feb 19;7(6):3785–90. doi: 10.1039/c5sc03856a (PMC6013815; doi:10.1039/c5sc03856a), 2016-02-19

## NMR spectra

### $^1\text{H}$ NMR

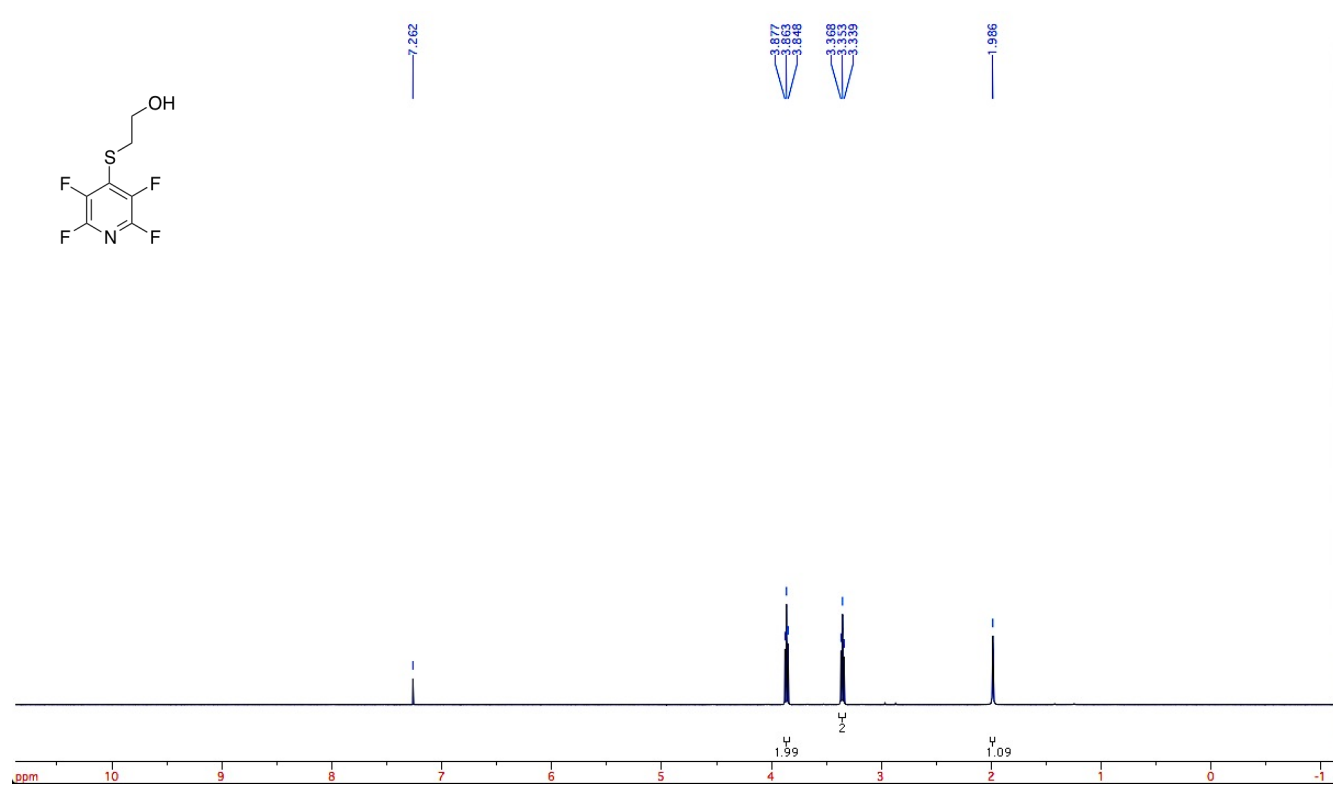

### $^{13}\text{C}$ $\{^{19}\text{F}\}$ NMR

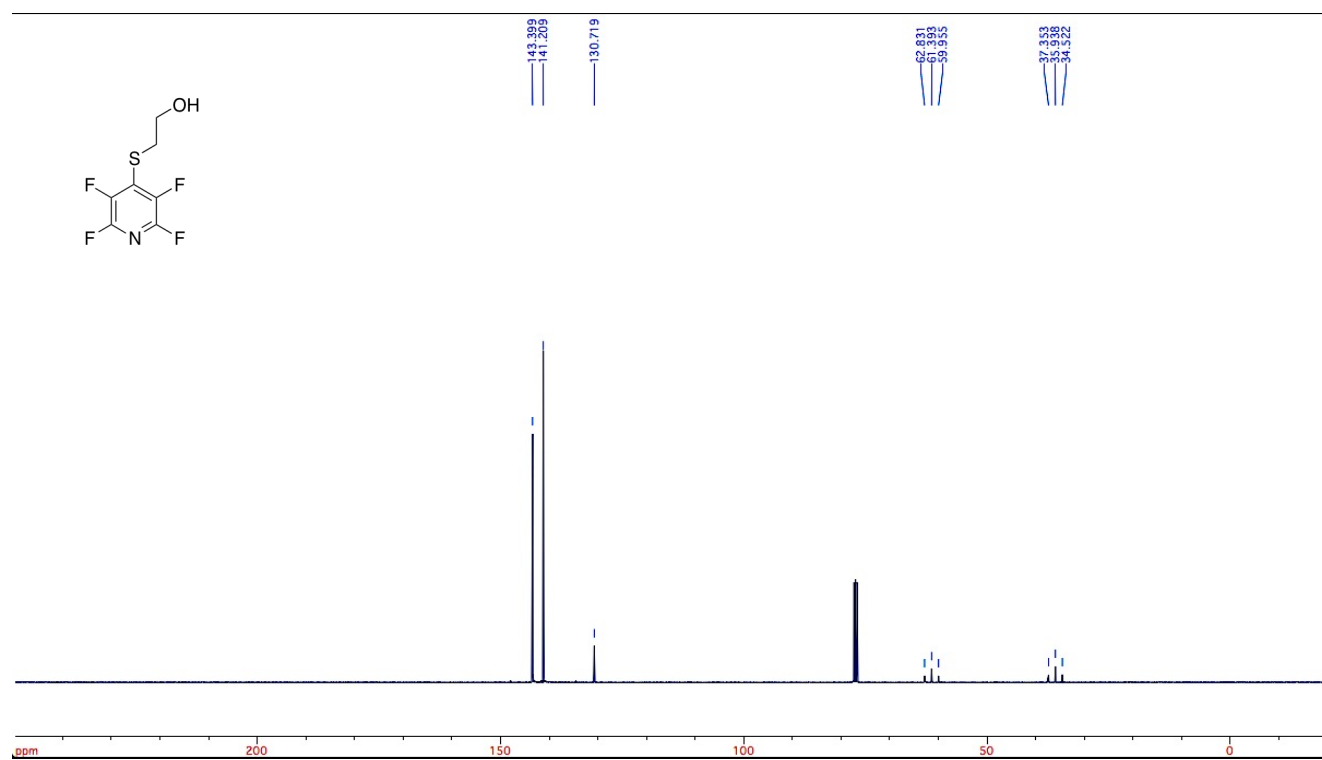

# <sup>19</sup>F NMR

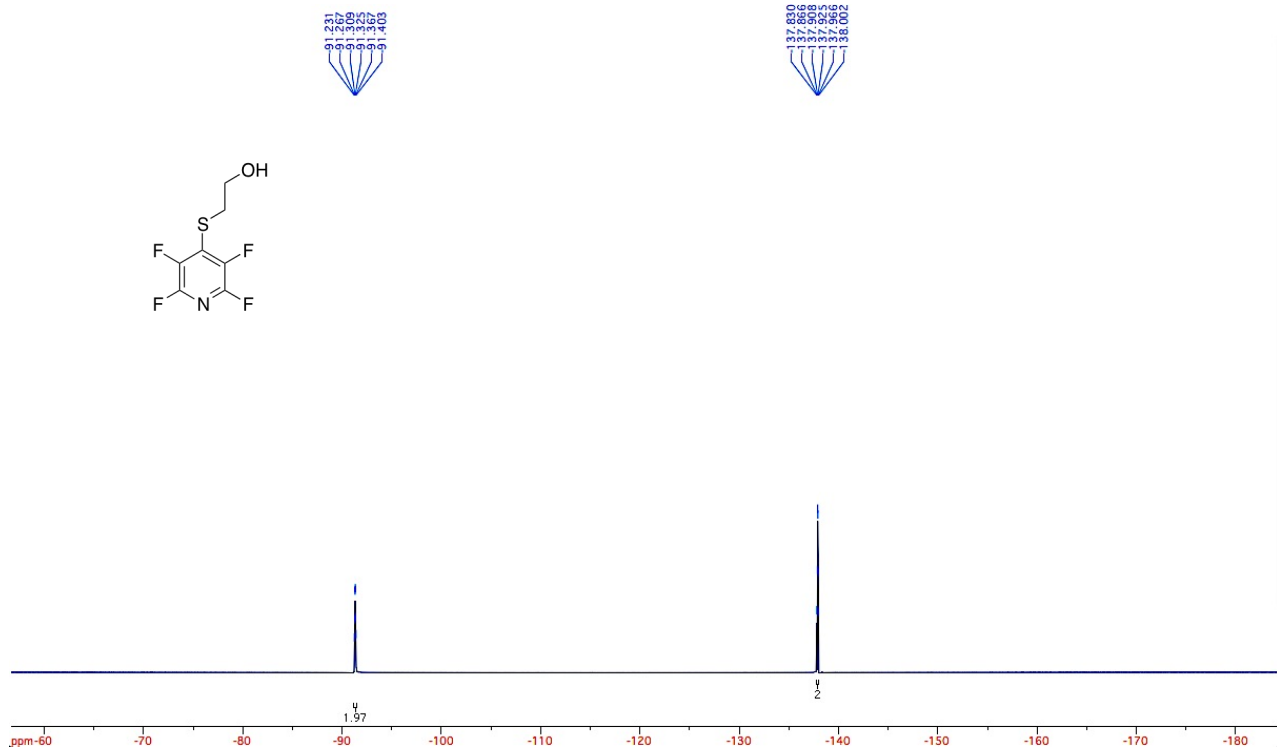

## gHSQC

376.318 MHz F19 gc2hsqc in cdcl3, temp 25.9 C -> actual temp = 27.0 C, onenmr probe

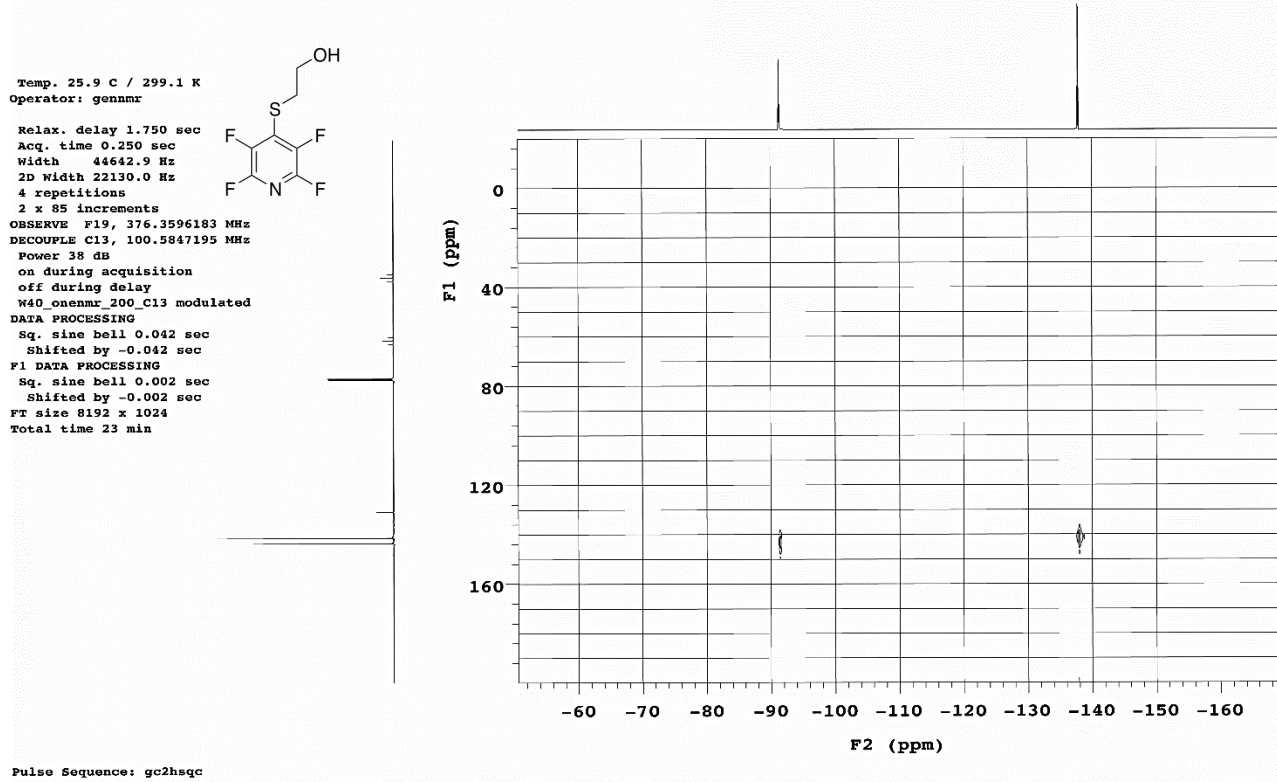

# $^1\text{H}$ NMR

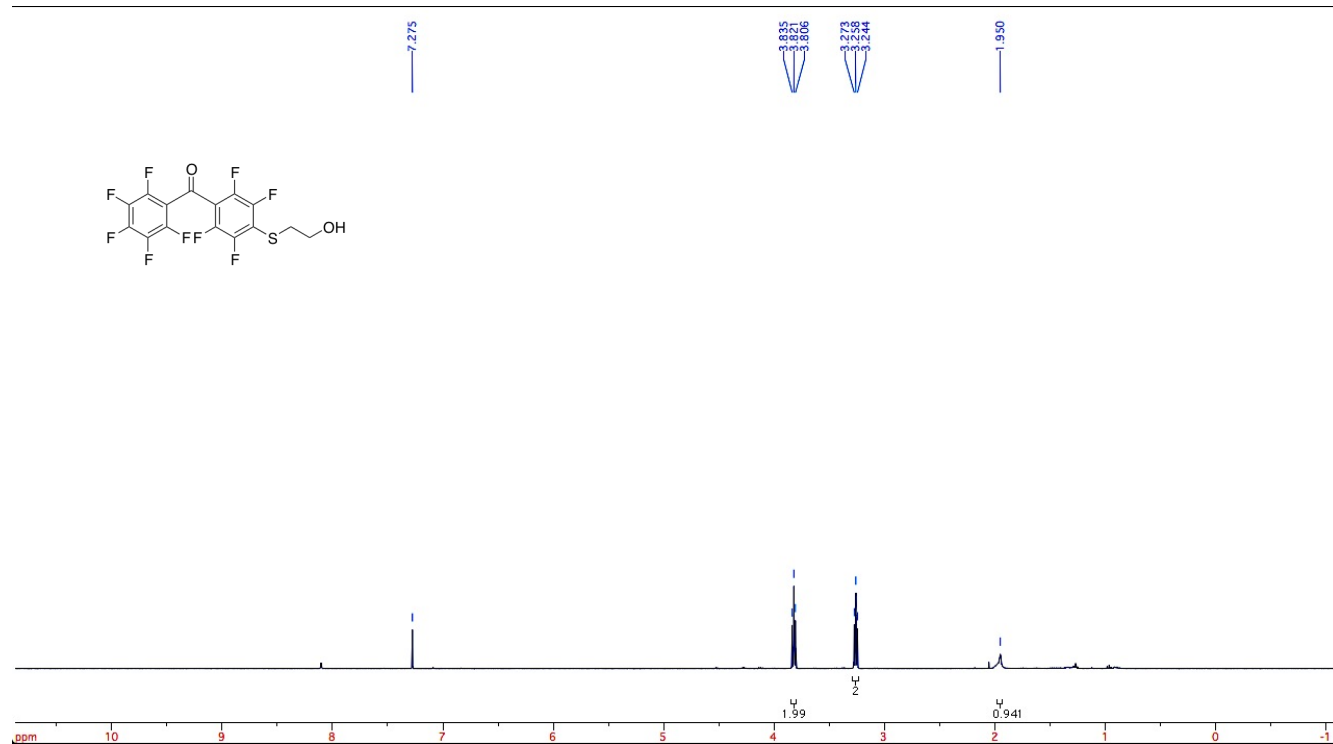

# $^{13}\text{C}$ $\{^{19}\text{F}\}$ NMR

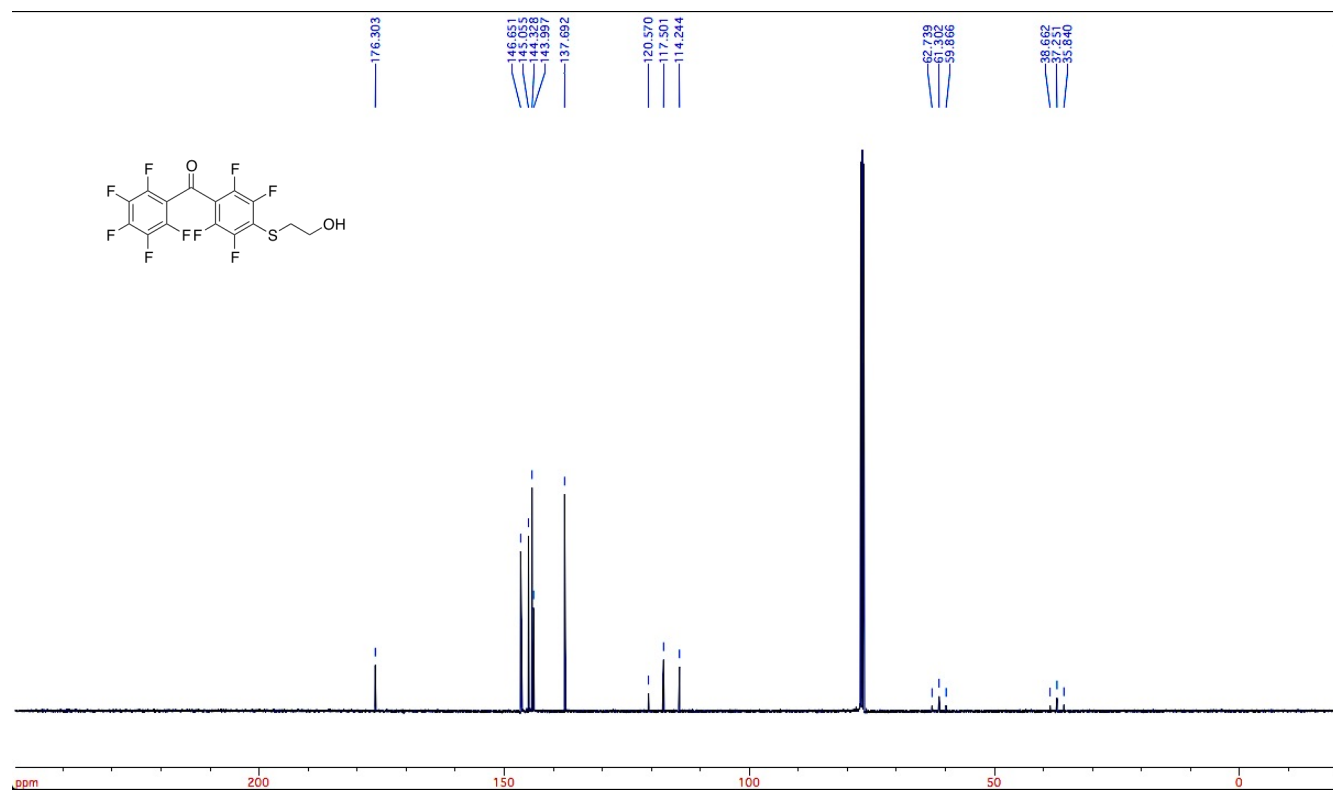

# <sup>19</sup>F NMR

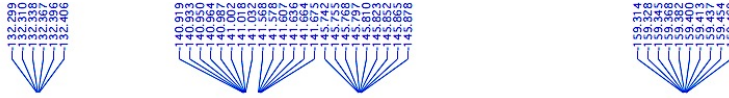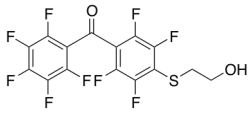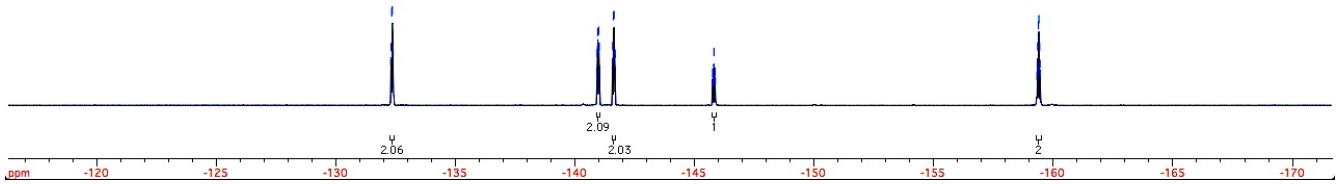

# gHSQC

376.318 MHz F19 gc2hsqc in cdcl3, temp 25.9 C -> actual temp = 27.0 C, onenmr probe

Temp. 25.9 C / 299.1 K  
Operator: gennmr  
  
Relax. delay 1.750 sec  
Acq. time 0.250 sec  
Width 44642.9 Hz  
2D Width 22130.0 Hz  
4 repetitions  
2 x 85 increments  
OBSERVE F19, 376.3596183 MHz  
DECOUPLE C13, 100.5847195 MHz  
Power 38 dB  
on during acquisition  
off during delay  
W40\_onenmr\_200\_C13 modulated  
DATA PROCESSING  
Sq. sine bell 0.042 sec  
Shifted by -0.042 sec  
F1 DATA PROCESSING  
Sq. sine bell 0.002 sec  
Shifted by -0.002 sec  
FT size 8192 x 1024  
Total time 23 min

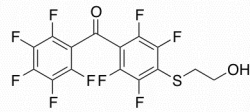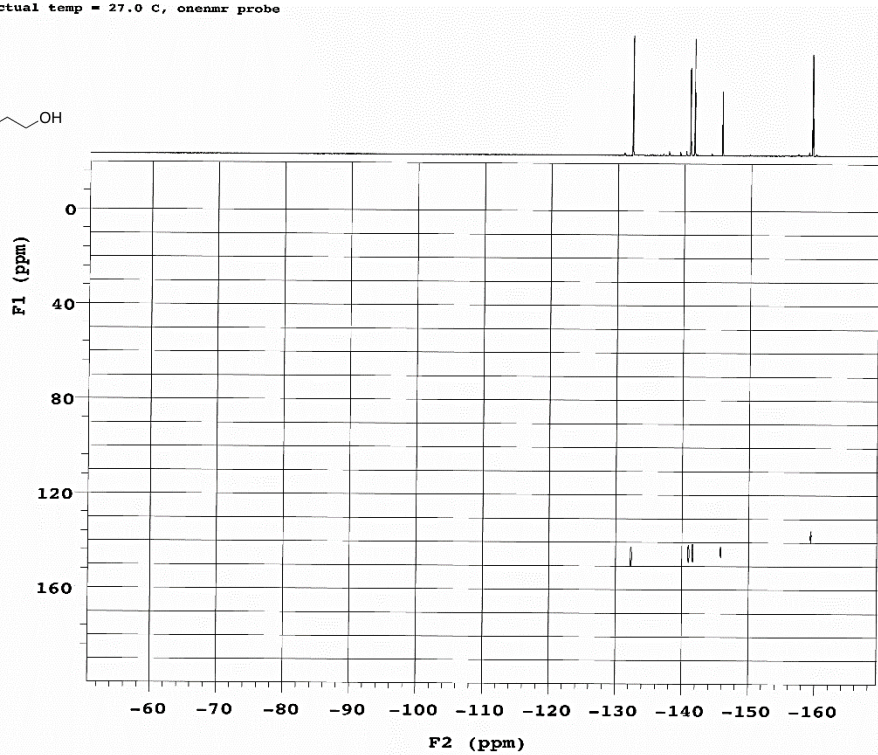

Pulse Sequence: gc2hsqc



# $^1\text{H}$ NMR

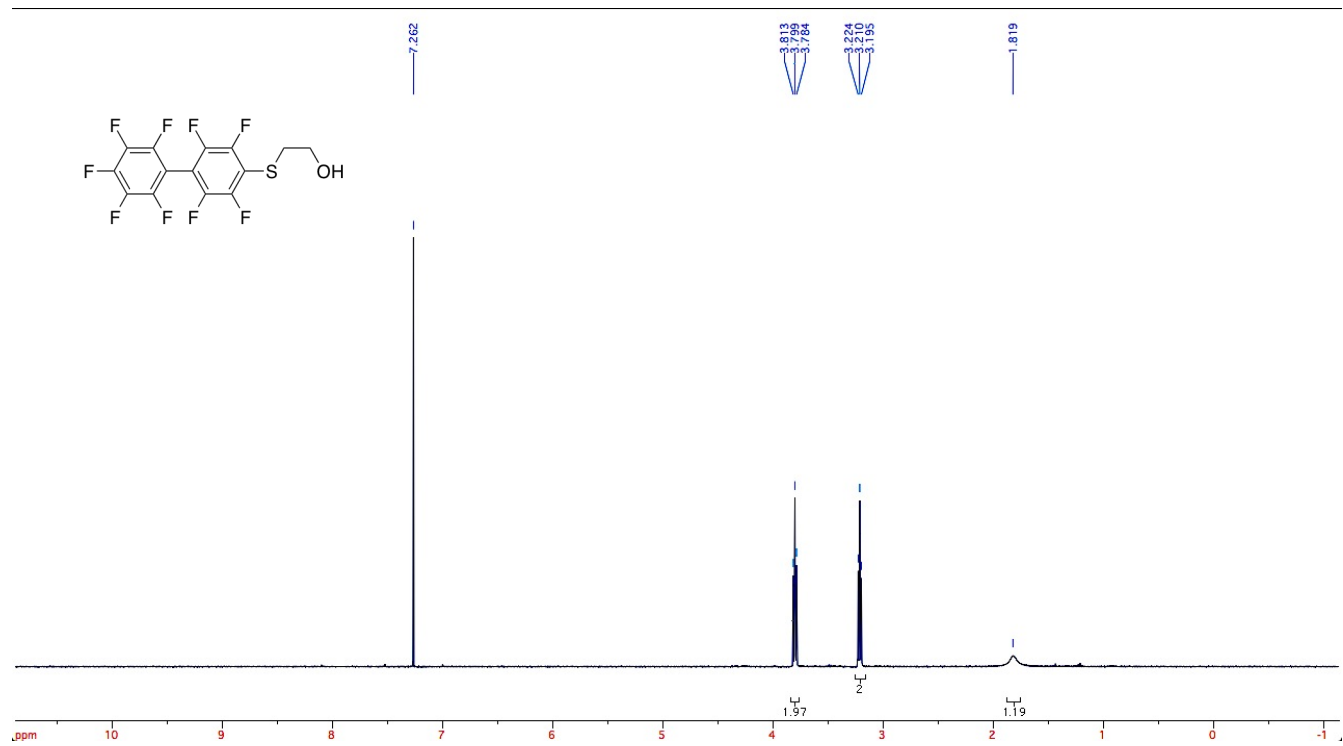

# $^{13}\text{C}$ $\{^{19}\text{F}\}$ NMR

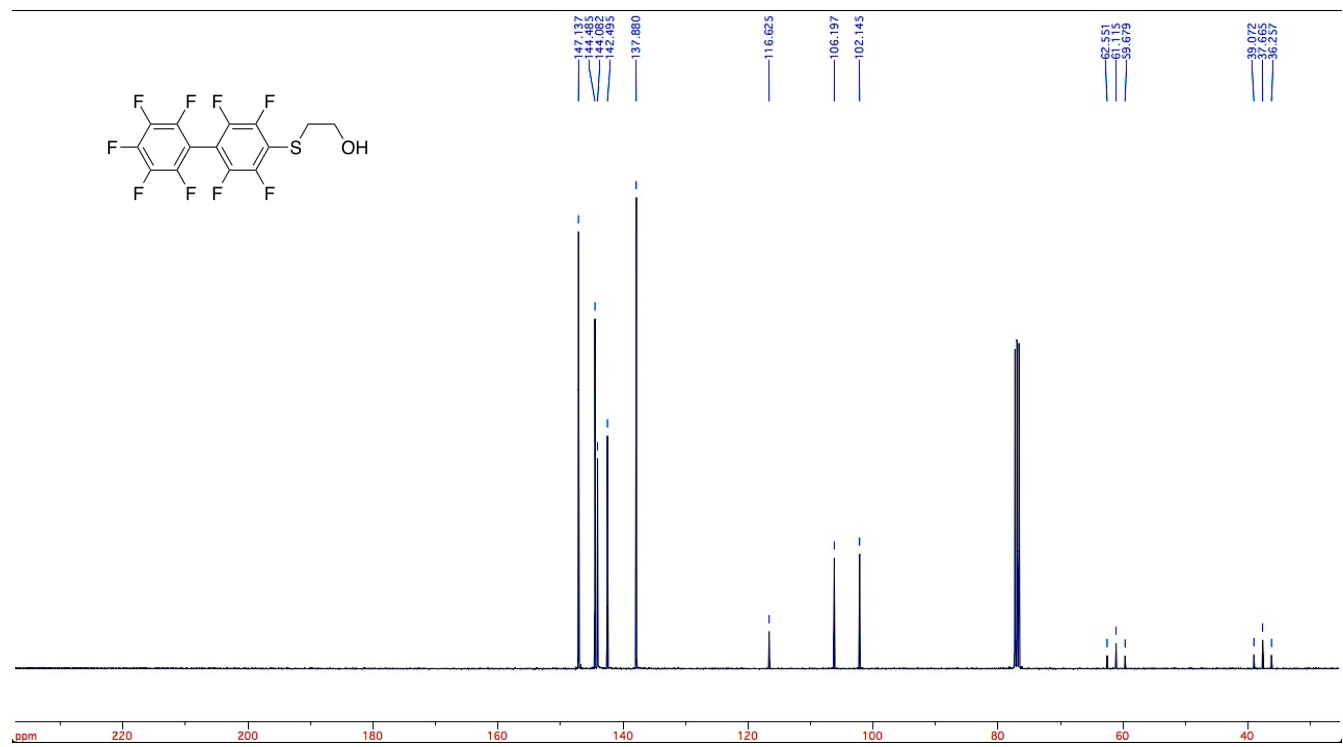

# <sup>19</sup>F NMR

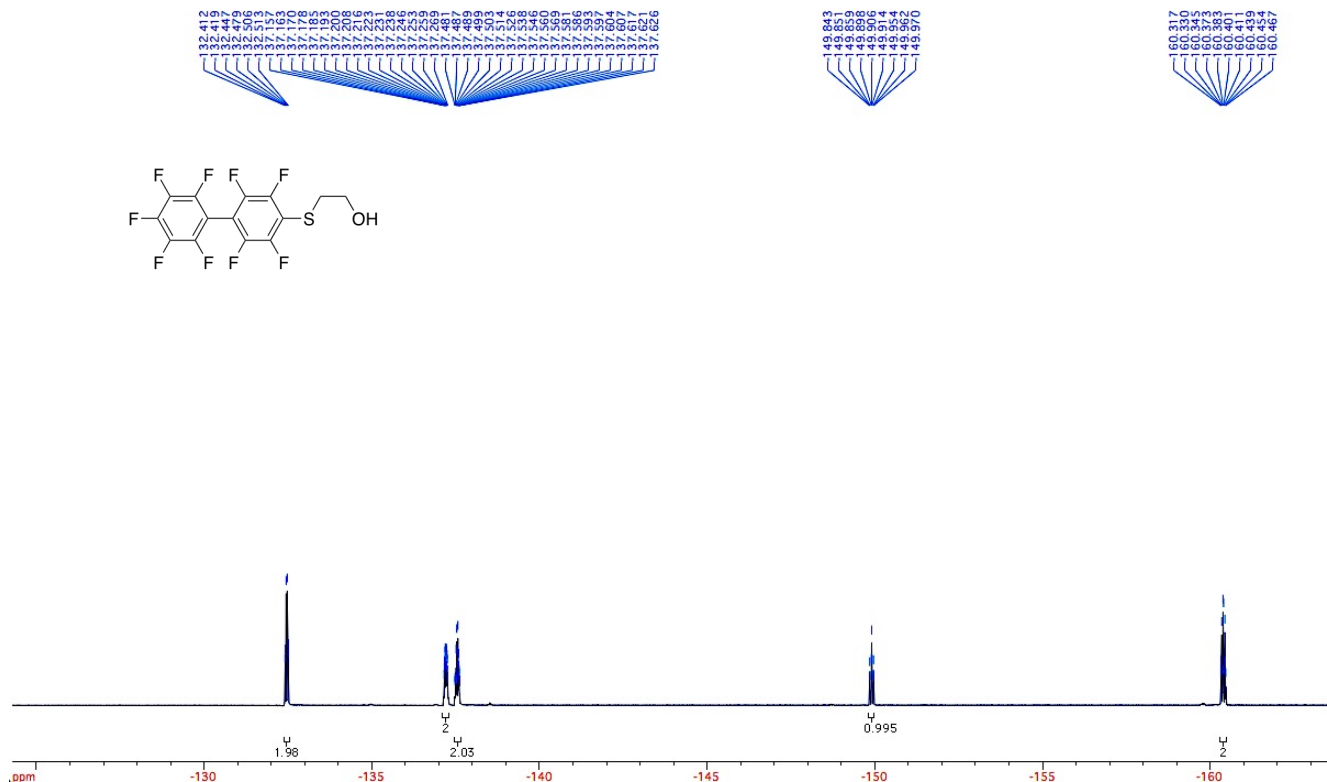

# gHSQC

376.318 MHz F19 gc2hsqc in cdcl3, temp 25.9 C -> actual temp = 27.0 C, onenmr probe

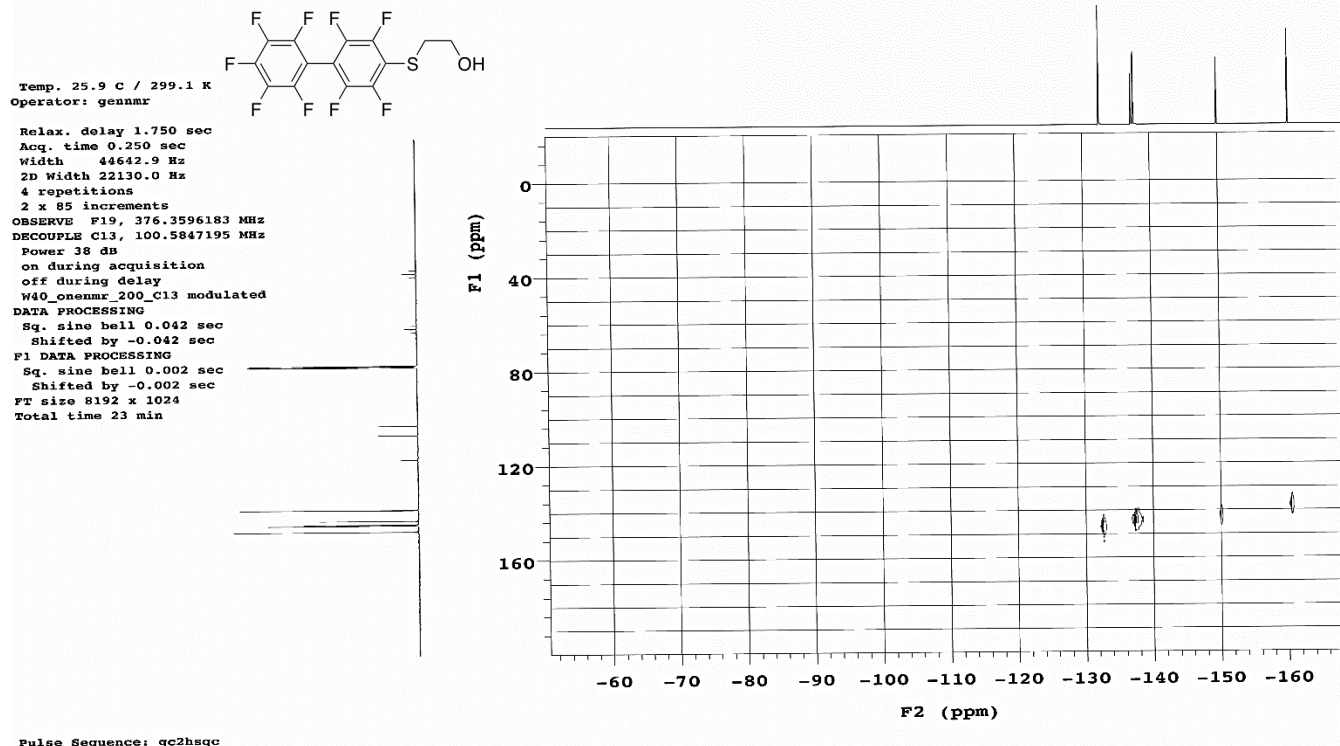

# $^1\text{H}$ NMR

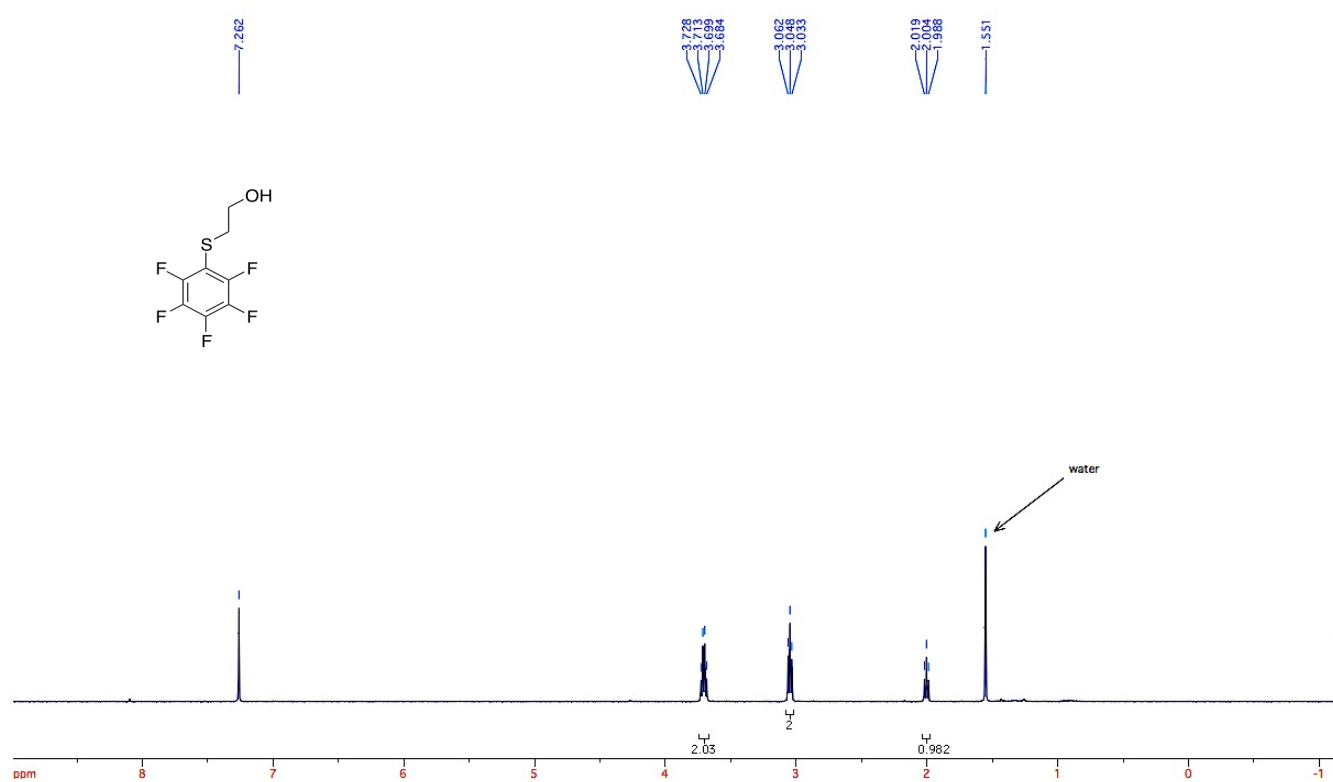

# $^{13}\text{C}$ $\{^{19}\text{F}\}$ NMR

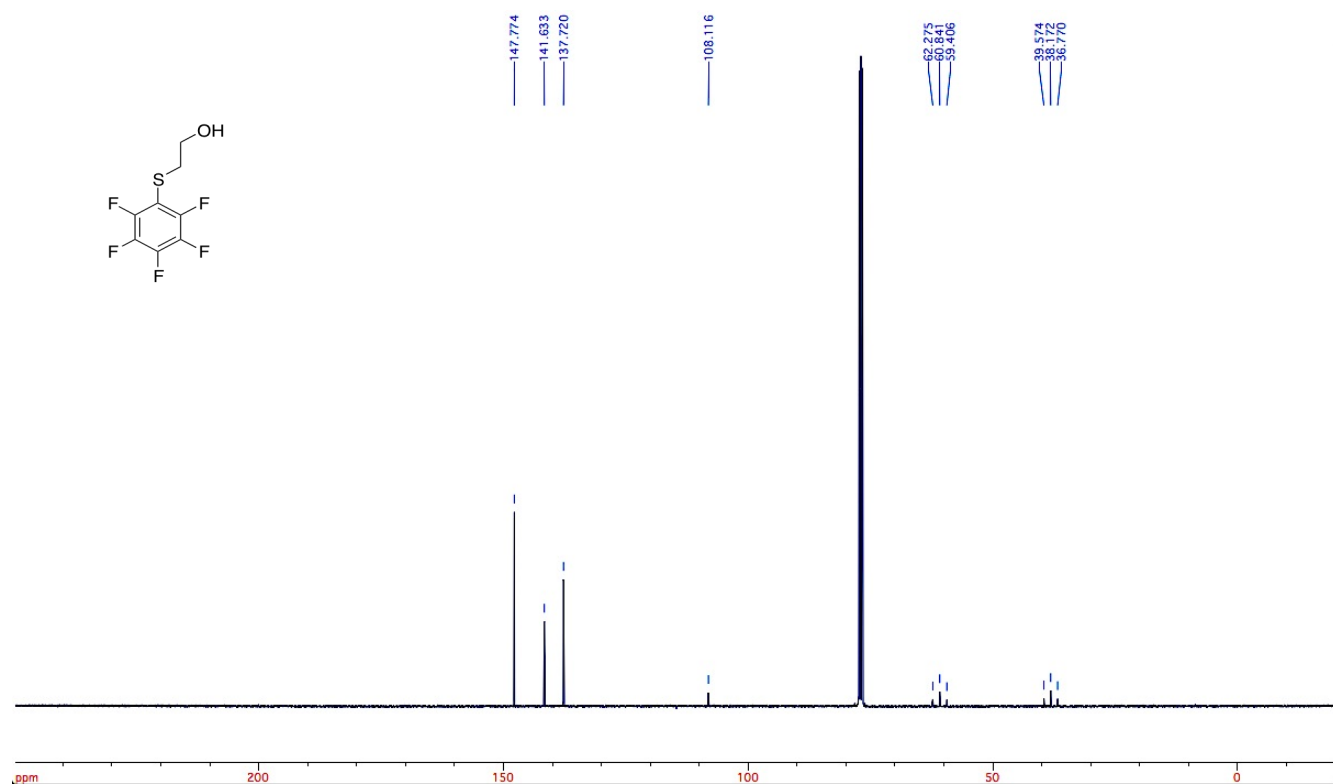

<sup>19</sup>F NMR

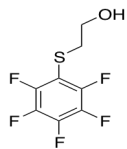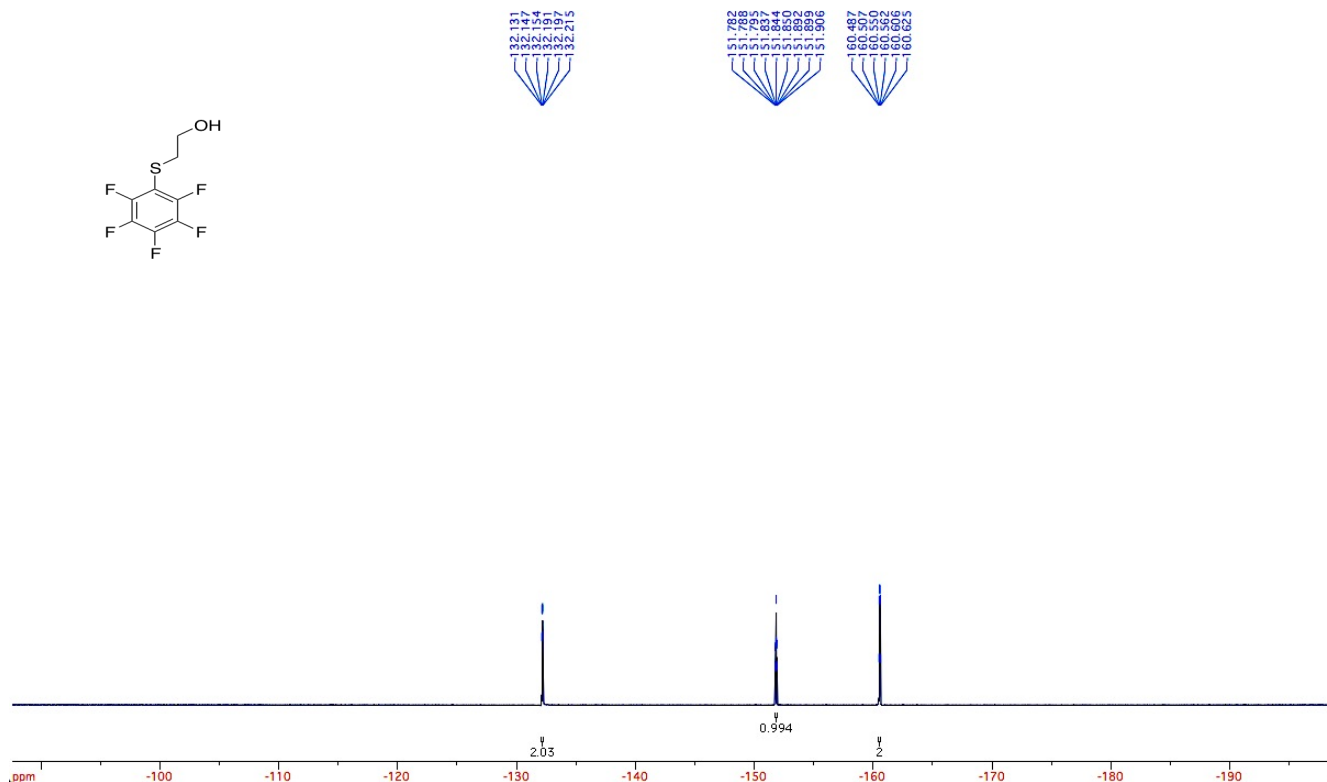

gHSQC

376.318 MHz F19 gc2hsqc in cdcl3, temp 25.9 C -> actual temp = 27.0 C, onenmr probe

Temp. 25.9 C / 299.1 K  
Operator: gennmr

Relax. delay 1.750 sec  
Acq. time 0.250 sec  
Width 44642.9 Hz  
2D Width 22130.0 Hz  
4 repetitions  
2 x 85 increments  
OBSERVE F19, 376.3596183 MHz  
DECOUPLE C13, 100.5847195 MHz  
Power 38 dB  
on during acquisition  
off during delay  
W40\_onenmr\_200\_C13 modulated  
DATA PROCESSING  
Sq. sine bell 0.042 sec  
Shifted by -0.042 sec  
F1 DATA PROCESSING  
Sq. sine bell 0.002 sec  
Shifted by -0.002 sec  
FT size 8192 x 1024  
Total time 23 min

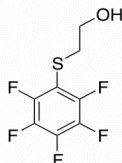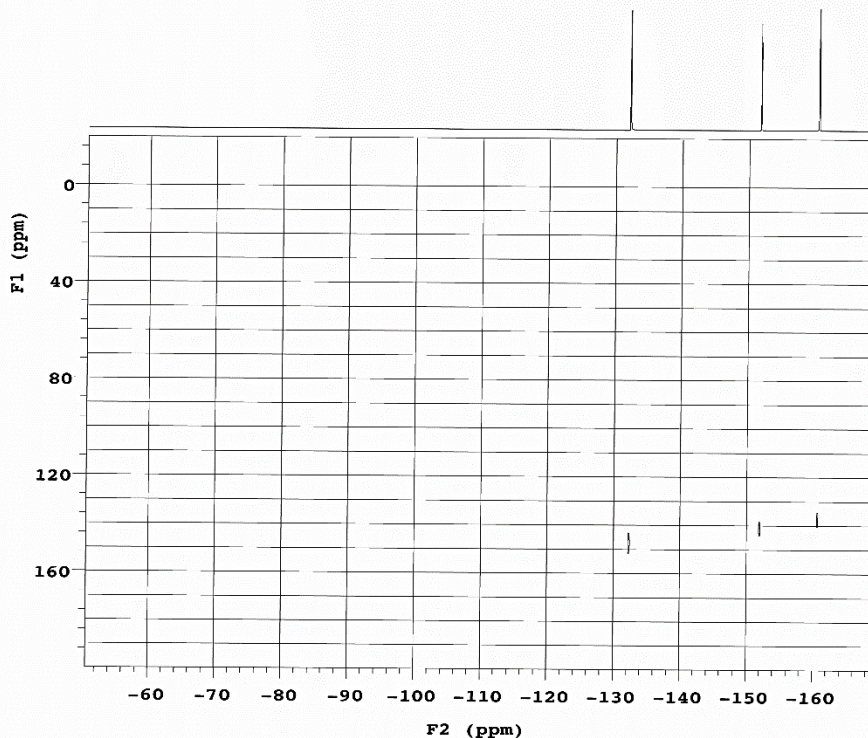

Pulse Sequence: gc2hsqc

# $^1\text{H}$ NMR

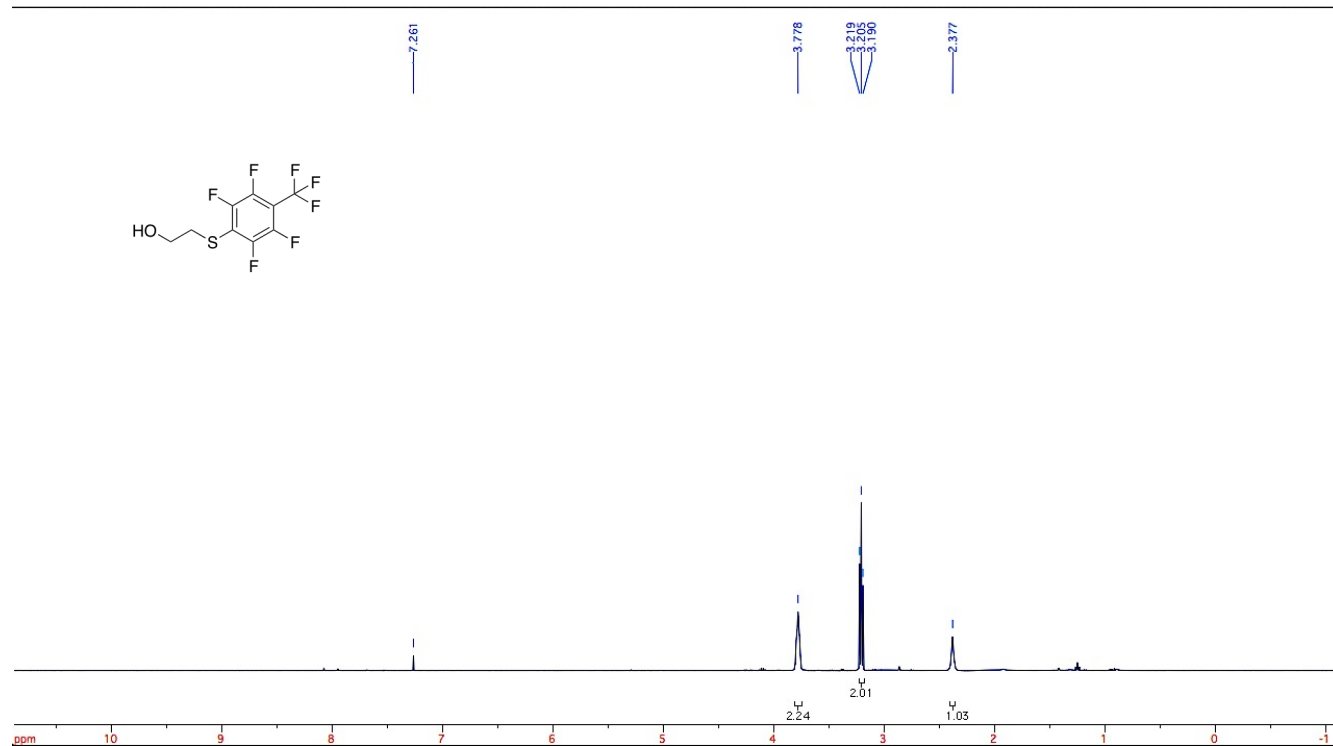

# $^{13}\text{C}$ { $^{19}\text{F}$ } NMR

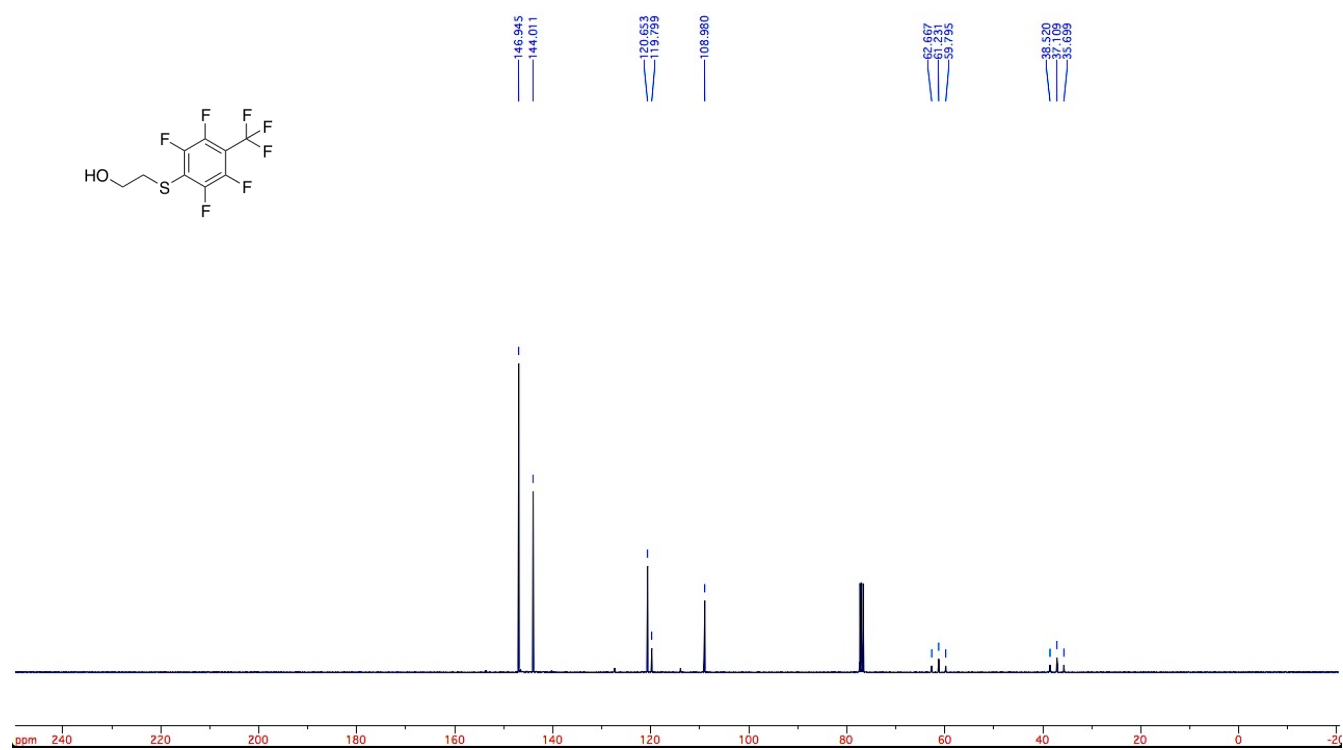

# <sup>19</sup>F NMR

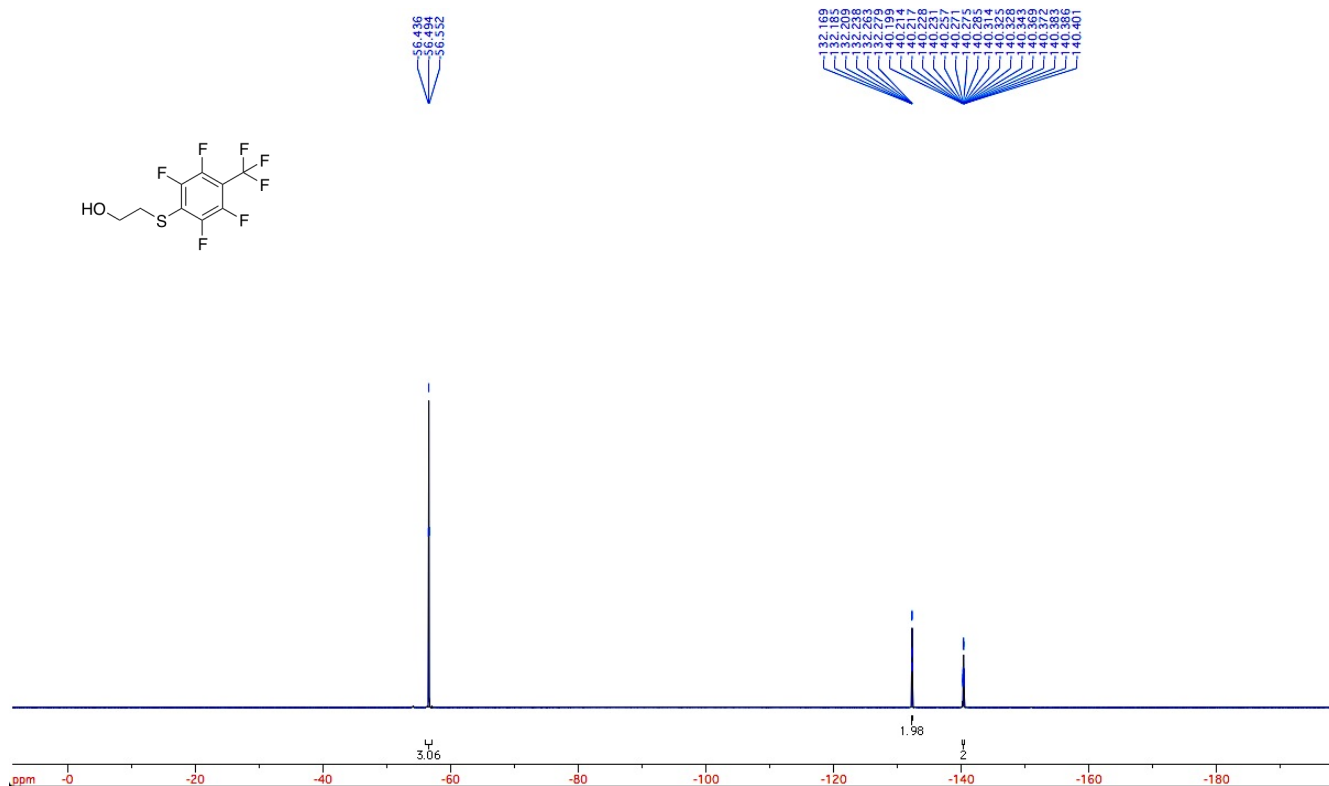

# gHSQC

376.318 MHz F19 gc2hsqc in cdcl3, temp 25.9 C -> actual temp = 27.0 C, onenmr probe

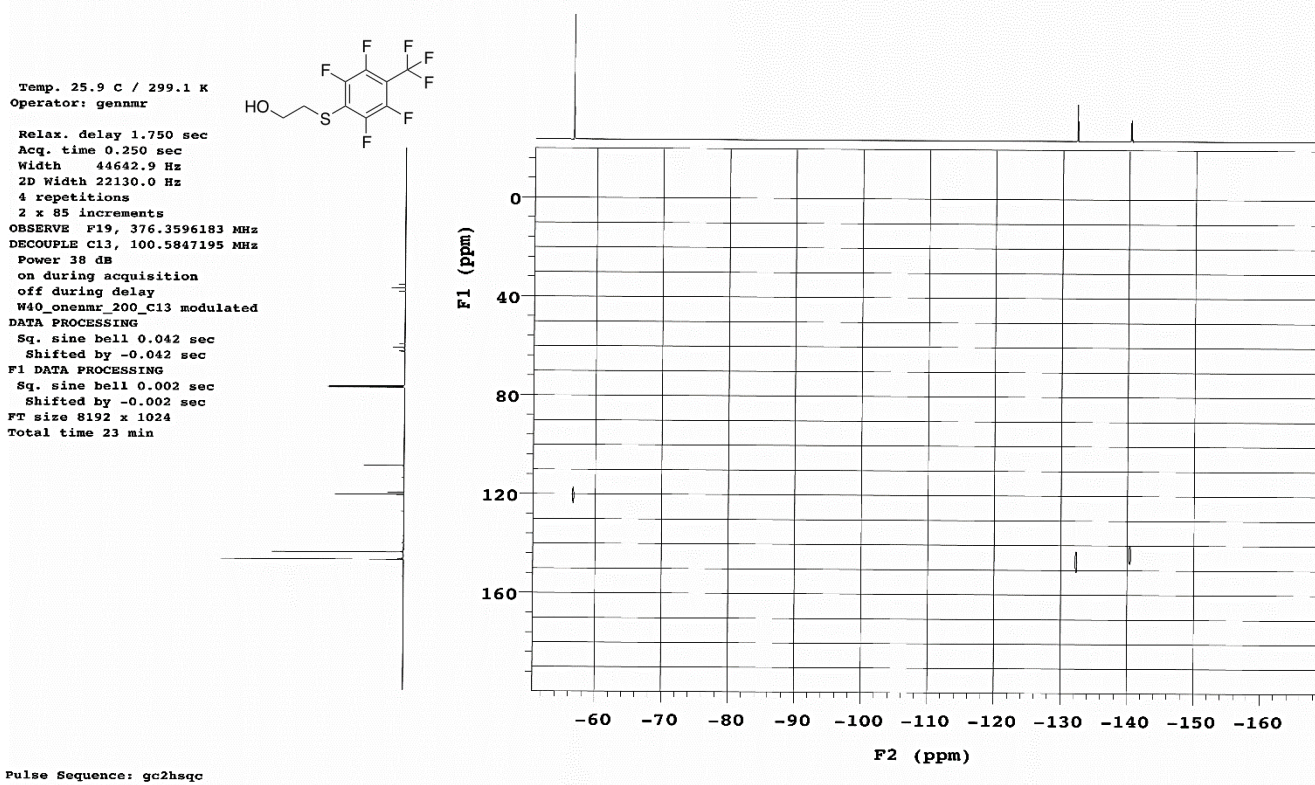



# $^1\text{H}$ NMR

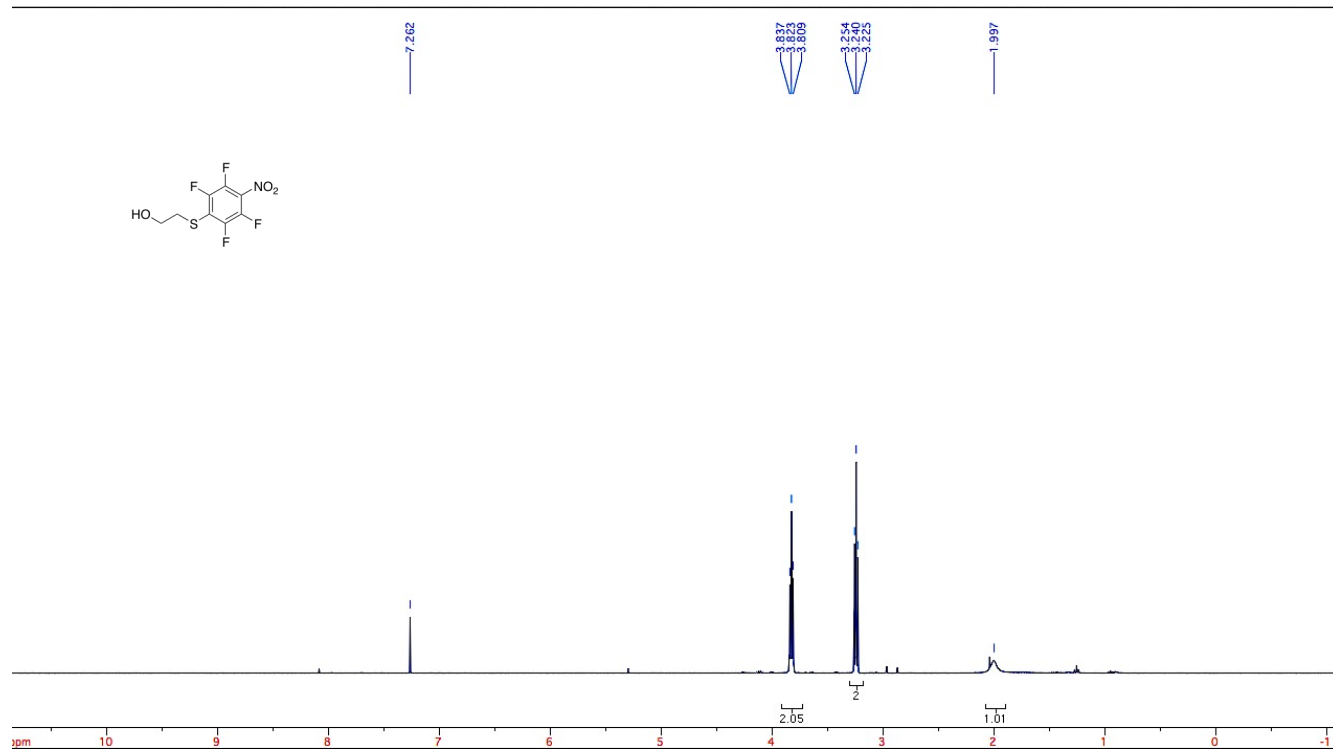

# $^{13}\text{C}$ $\{^{19}\text{F}\}$ NMR

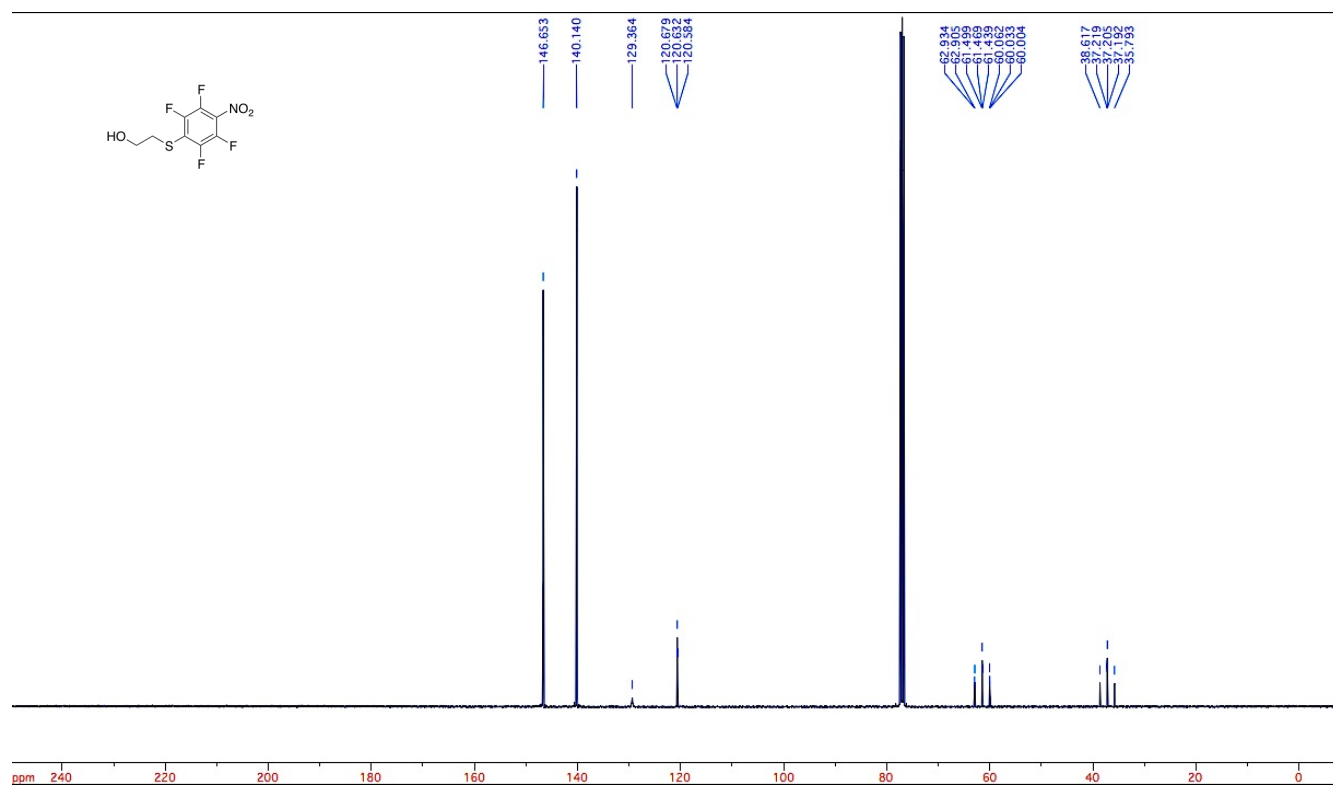

<sup>19</sup>F NMR

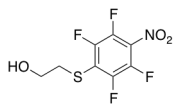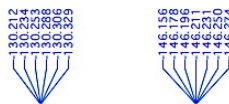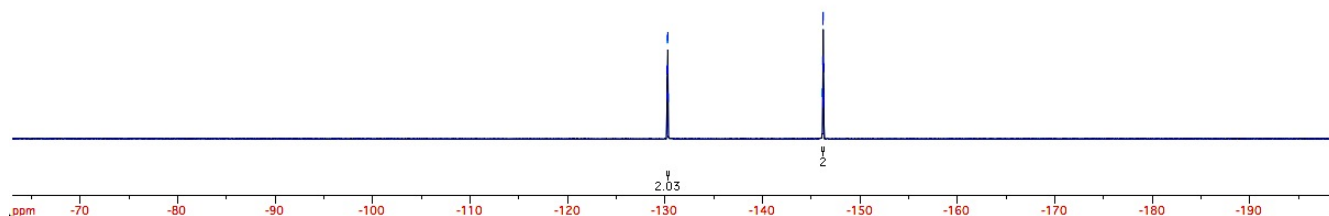

gHSQC

376.318 MHz F19 gc2hsqc in cdcl3, temp 25.9 C -> actual temp = 27.0 C, onenmr probe

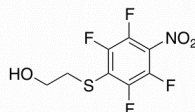

Temp. 25.9 C / 299.1 K  
 Operator: gennar  
 Relax. delay 1.750 sec  
 Acq. time 0.250 sec  
 Width 44642.9 Hz  
 2D Width 22130.0 Hz  
 4 repetitions  
 2 x 85 increments  
 OBSERVE F19, 376.3596183 MHz  
 DECOUPLE C13, 100.5847195 MHz  
 Power 38 dB  
 on during acquisition  
 off during delay  
 W40\_onenmr\_200\_C13 modulated  
 DATA PROCESSING  
 Sq. sine bell 0.042 sec  
 Shifted by -0.042 sec  
 F1 DATA PROCESSING  
 Sq. sine bell 0.002 sec  
 Shifted by -0.002 sec  
 FT size 8192 x 1024  
 Total time 23 min

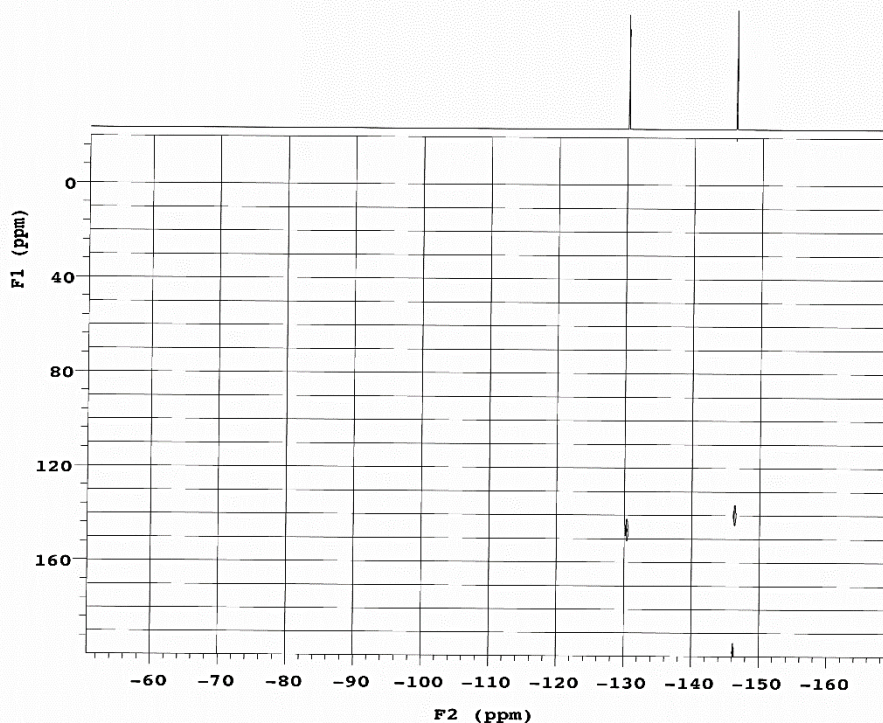

Pulse Sequence: gc2hsqc

# $^1\text{H}$ NMR

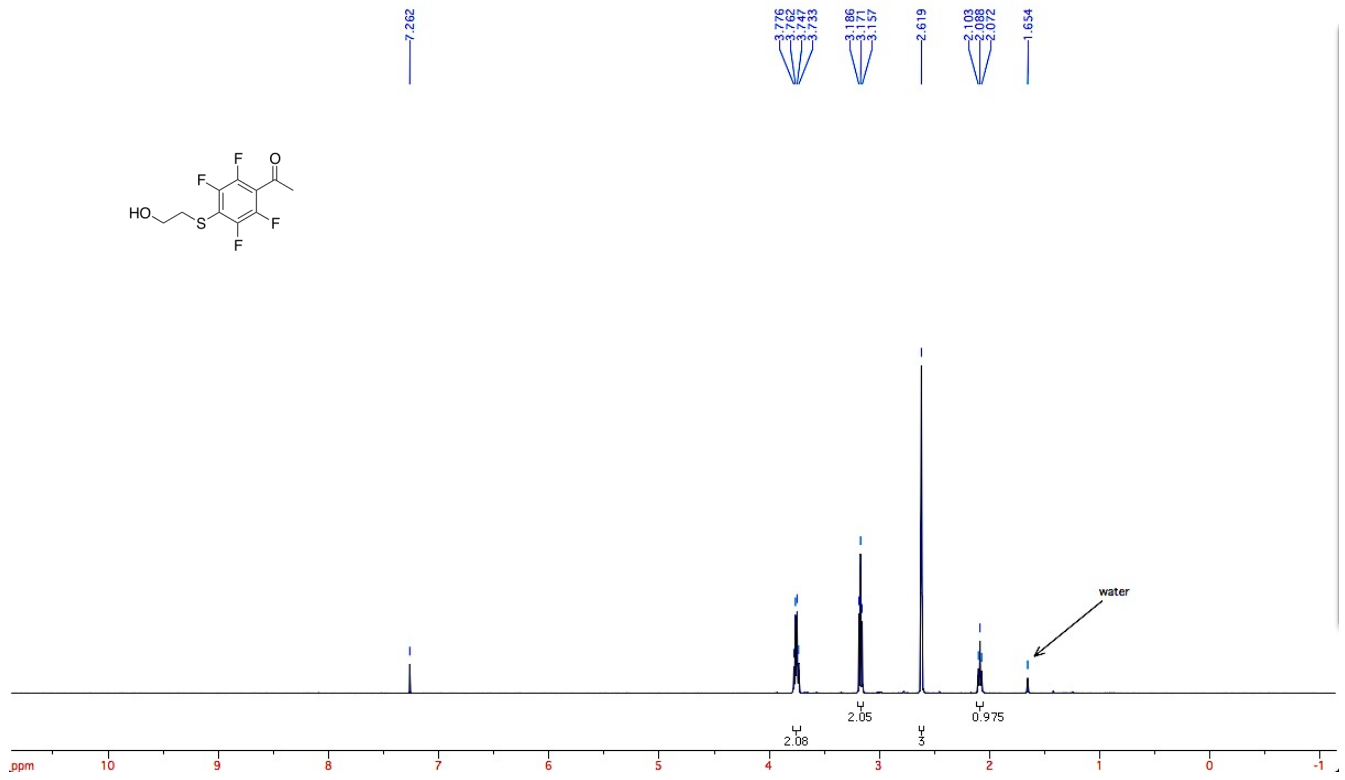

# $^{13}\text{C}$ $\{^{19}\text{F}\}$ NMR

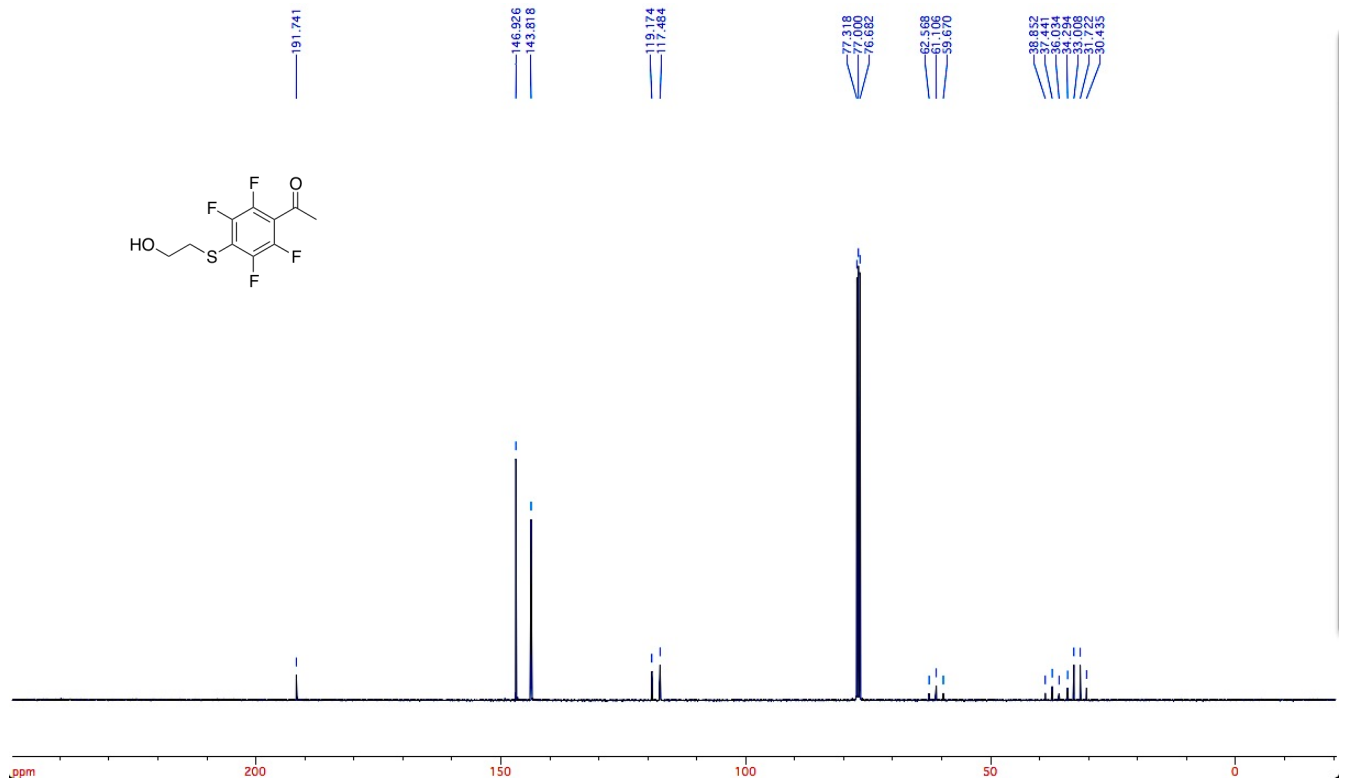

# <sup>19</sup>F NMR

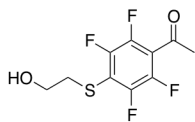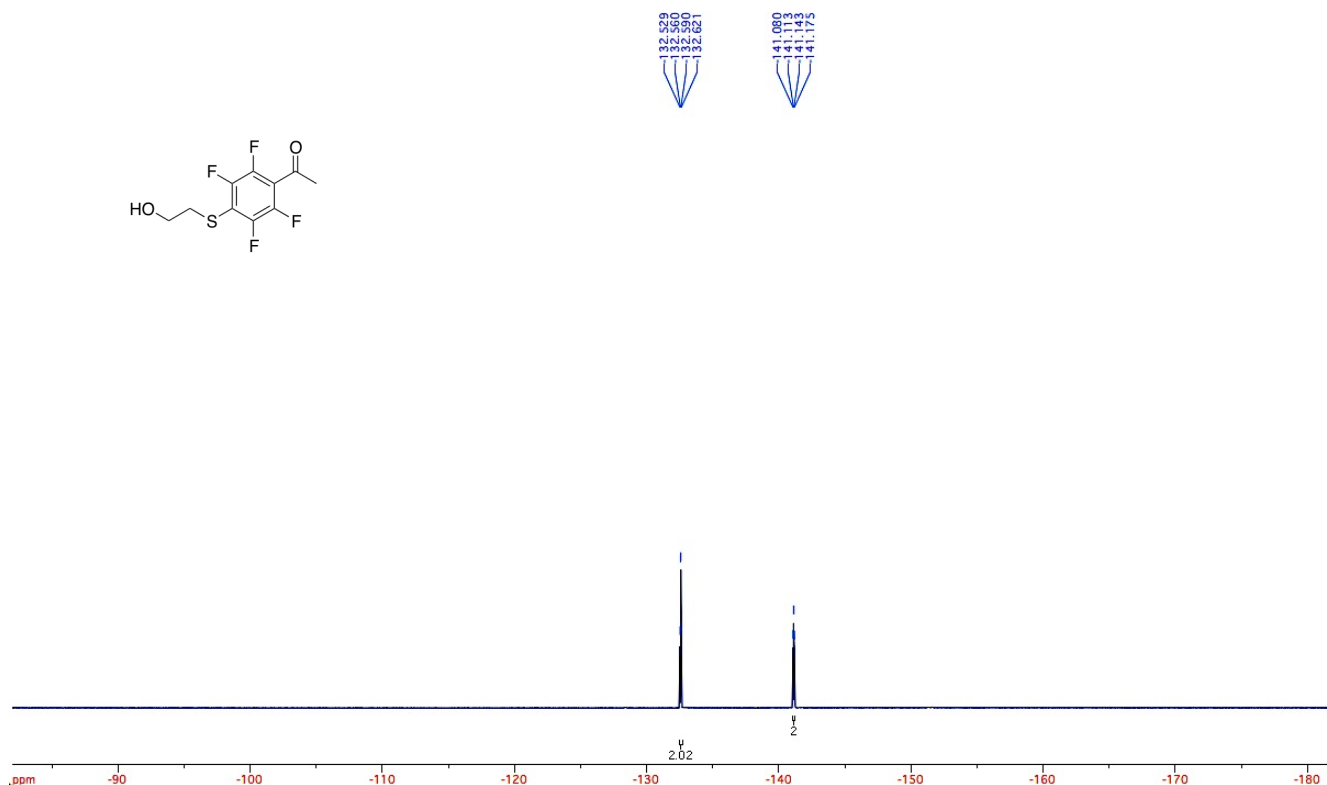

# gHSQC

376.318 MHz F19 gc2hsqc in cdcl3, temp 25.9 C -> actual temp = 27.0 C, onenmr probe

Temp. 25.9 C / 299.1 K  
Operator: genmr

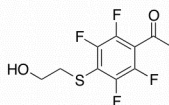

Relax. delay 1.750 sec  
Acq. time 0.250 sec  
Width 44642.9 Hz  
2D Width 22130.0 Hz  
4 repetitions  
2 x 85 increments  
OBSERVE F19, 376.3596183 MHz  
DECOUPLE C13, 100.5847195 MHz  
Power 38 dB  
on during acquisition  
off during delay  
W40\_onenmr\_200\_C13 modulated  
DATA PROCESSING  
Sq. sine bell 0.042 sec  
Shifted by -0.042 sec  
F1 DATA PROCESSING  
Sq. sine bell 0.002 sec  
Shifted by -0.002 sec  
FT size 8192 x 1024  
Total time 23 min

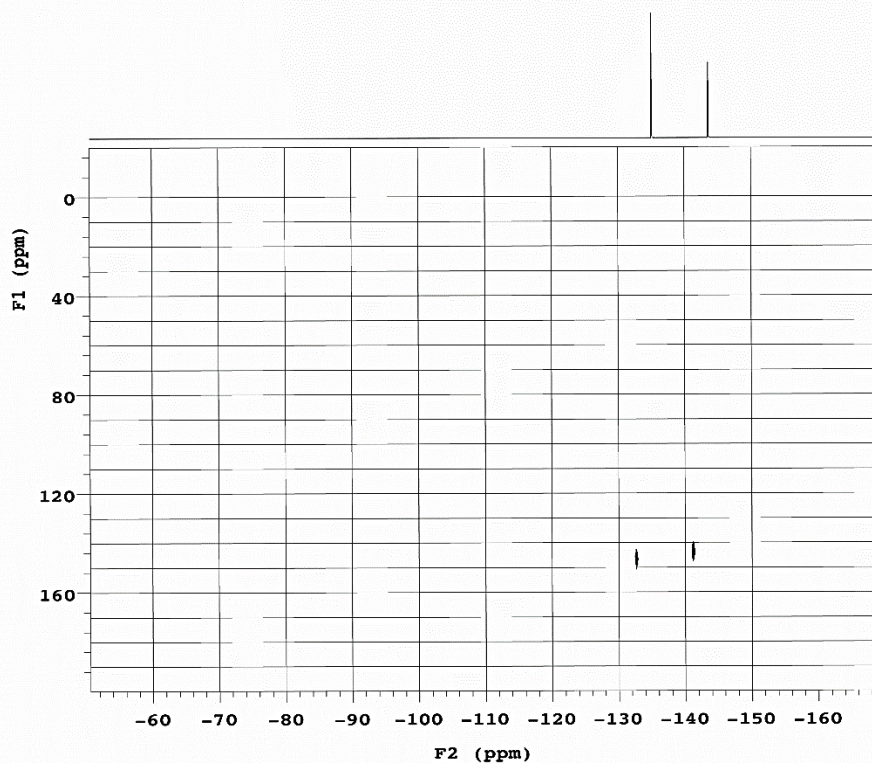

Pulse Sequence: gc2hsqc

# <sup>1</sup>H NMR

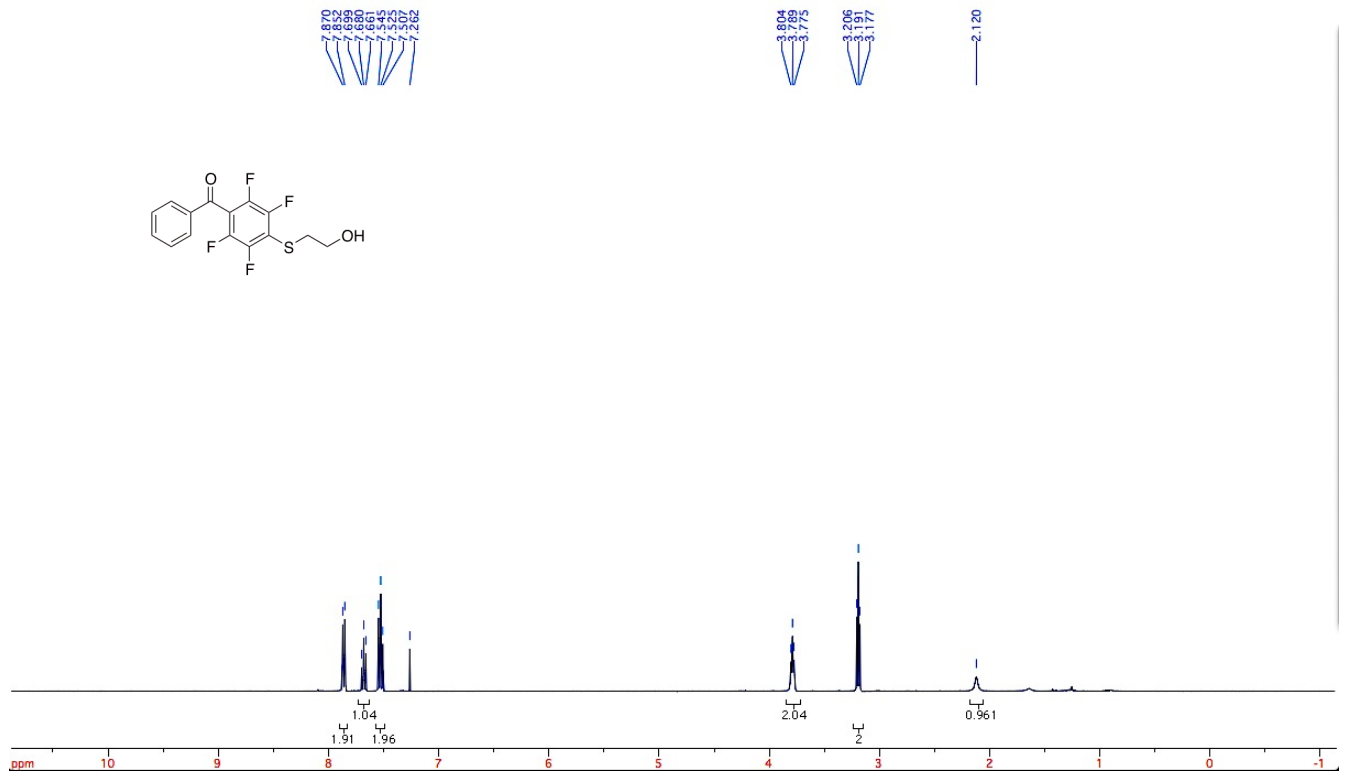

# <sup>13</sup>C {<sup>19</sup>F} NMR

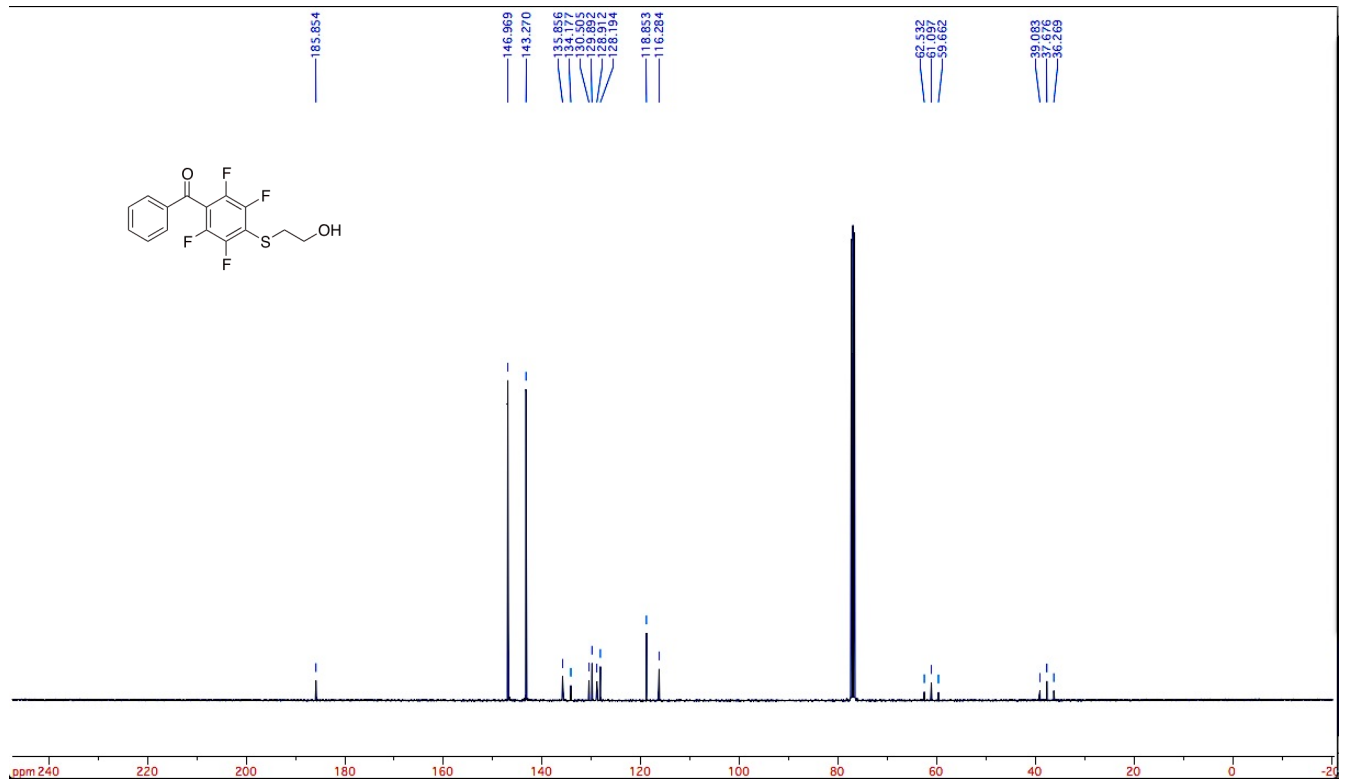

# <sup>19</sup>F NMR

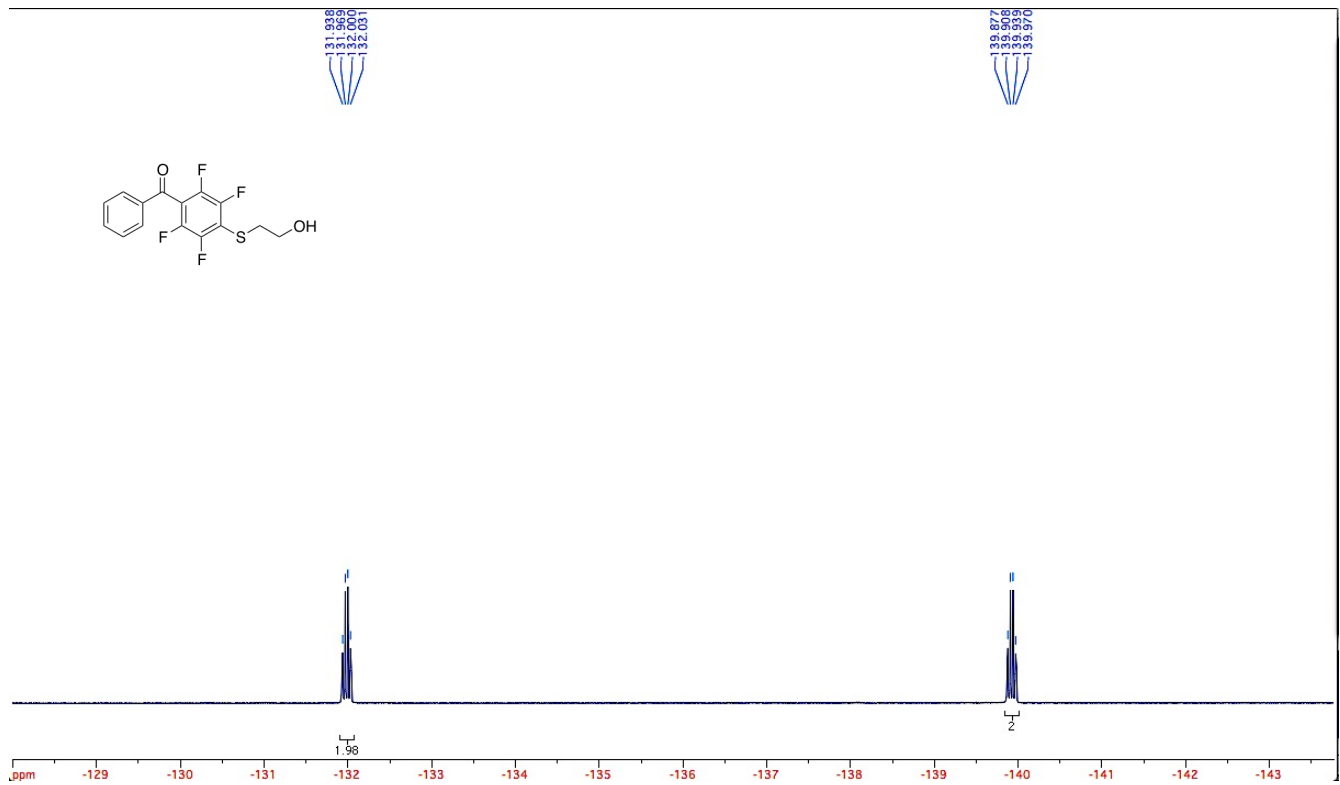

# gHSQC

Temp. 25.9 C / 299.1 K  
Operator: gennmr  
Relax. delay 1.750 sec  
Acq. time 0.250 sec  
Width 44642.9 Hz  
2D Width 22130.0 Hz  
4 repetitions  
2 x 85 increments  
OBSERVE F19, 376.3596183 MHz  
DECOUPLE C13, 100.5847195 MHz  
Power 38 dB  
on during acquisition  
off during delay  
W40\_onenmr\_200\_C13 modulated  
DATA PROCESSING  
Sq. sine bell 0.042 sec  
Shifted by -0.042 sec  
F1 DATA PROCESSING  
Sq. sine bell 0.002 sec  
Shifted by -0.002 sec  
FT size 8192 x 1024  
Total time 23 min

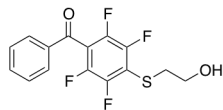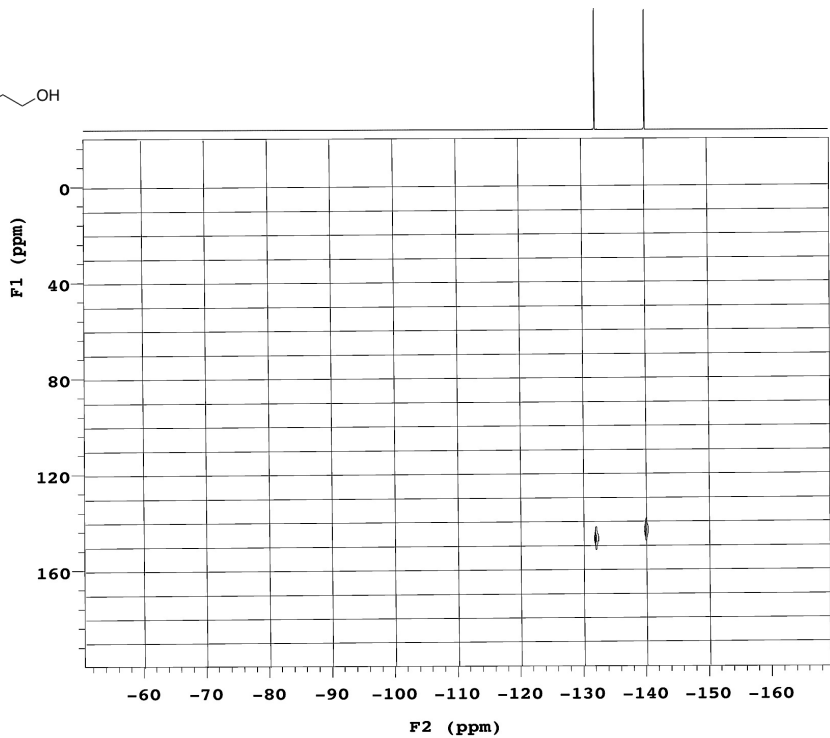

Pulse Sequence: gc2hsqc



# $^1\text{H}$ NMR

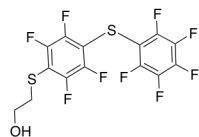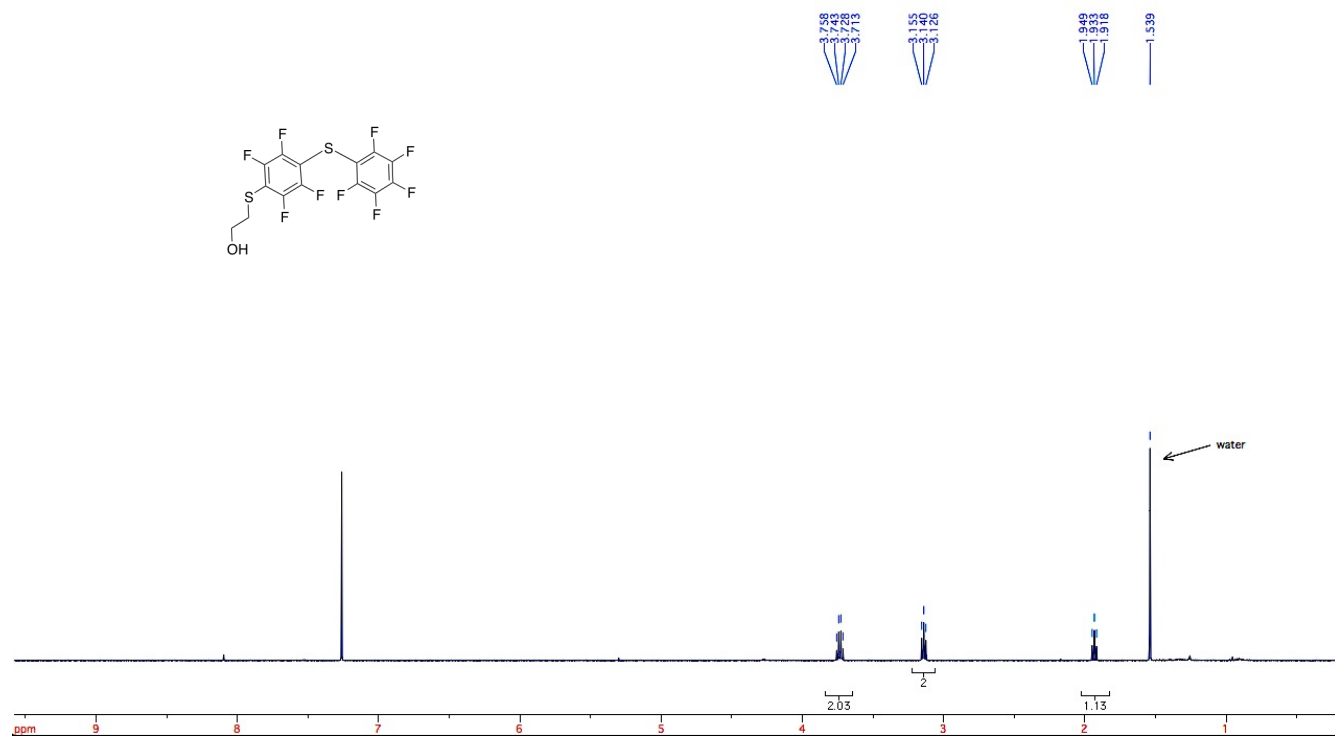

# $^{13}\text{C}$ $\{^{19}\text{F}\}$ NMR

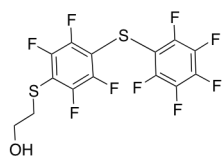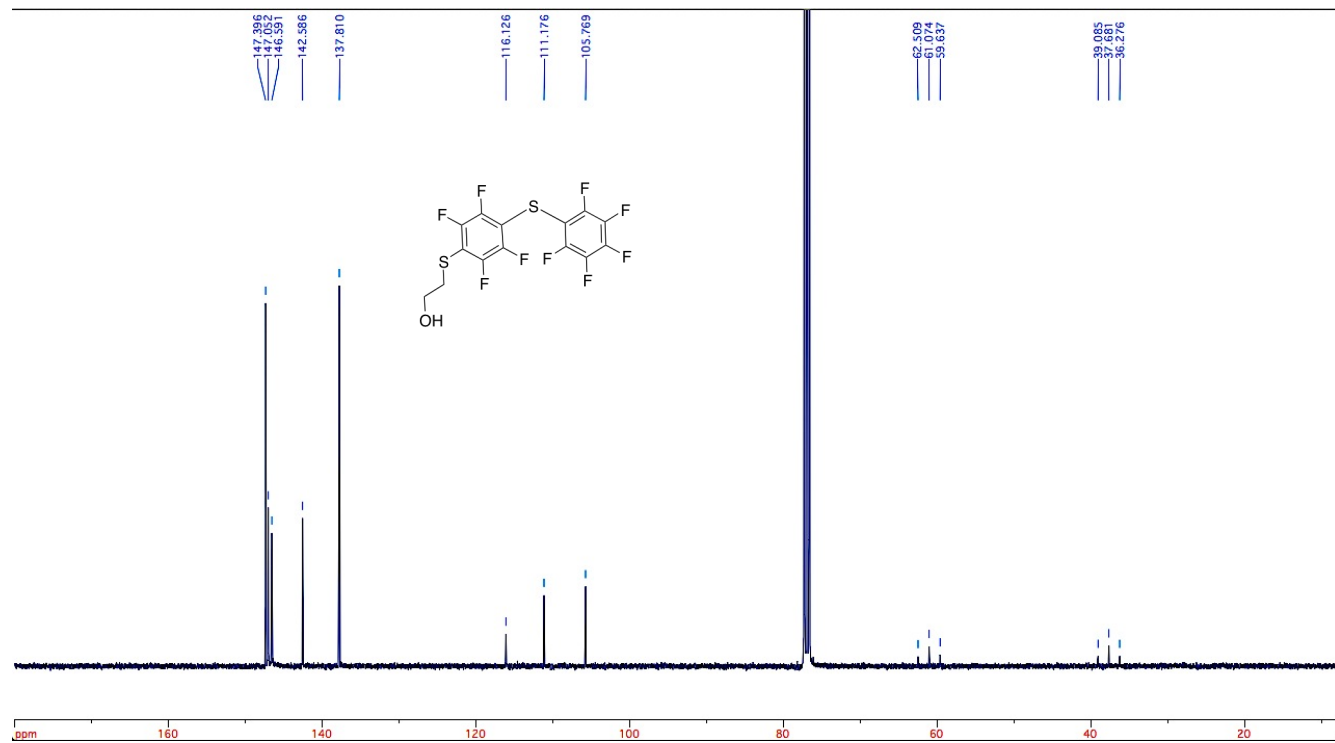

# <sup>19</sup>F NMR

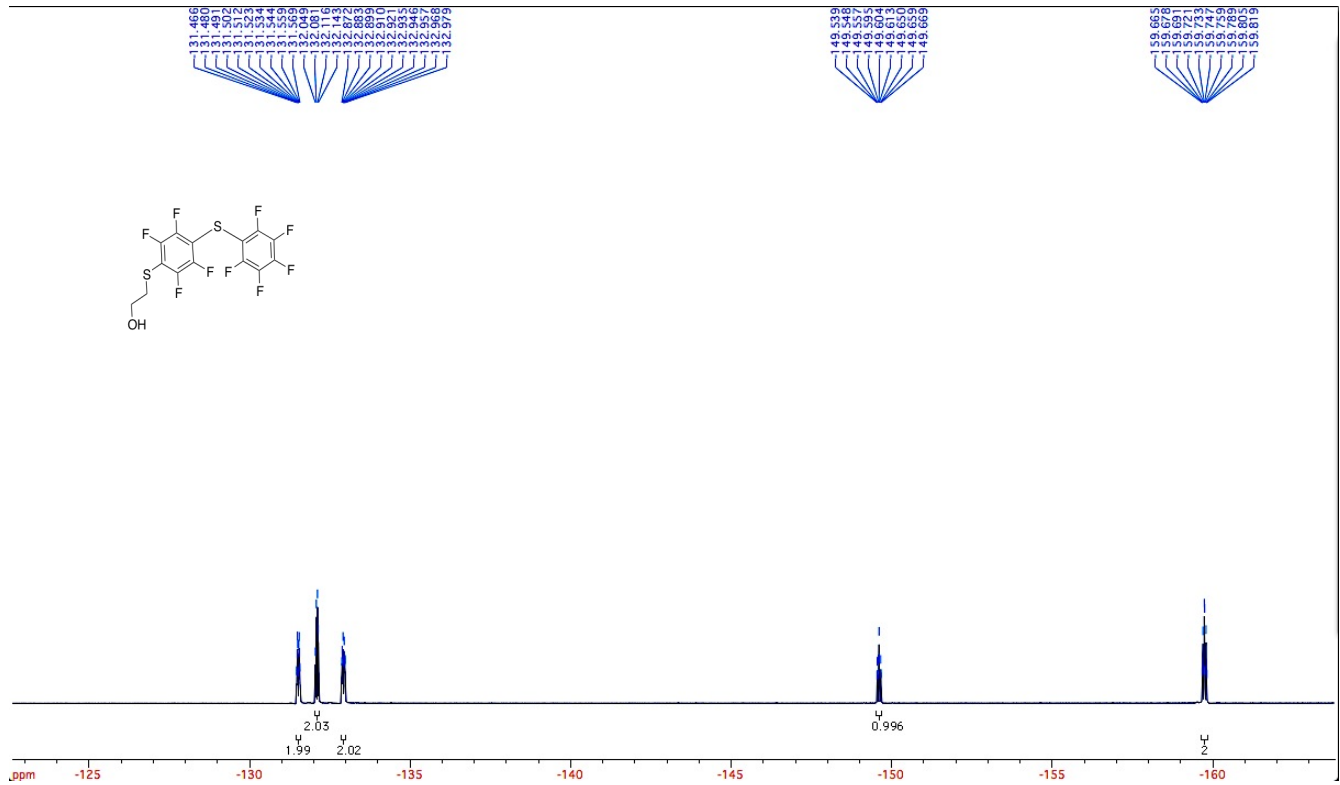

## gHSQC

376.318 MHz F19 gc2hsqc in cdcl3, temp 25.9 C -> actual temp = 27.0 C, onenmr probe

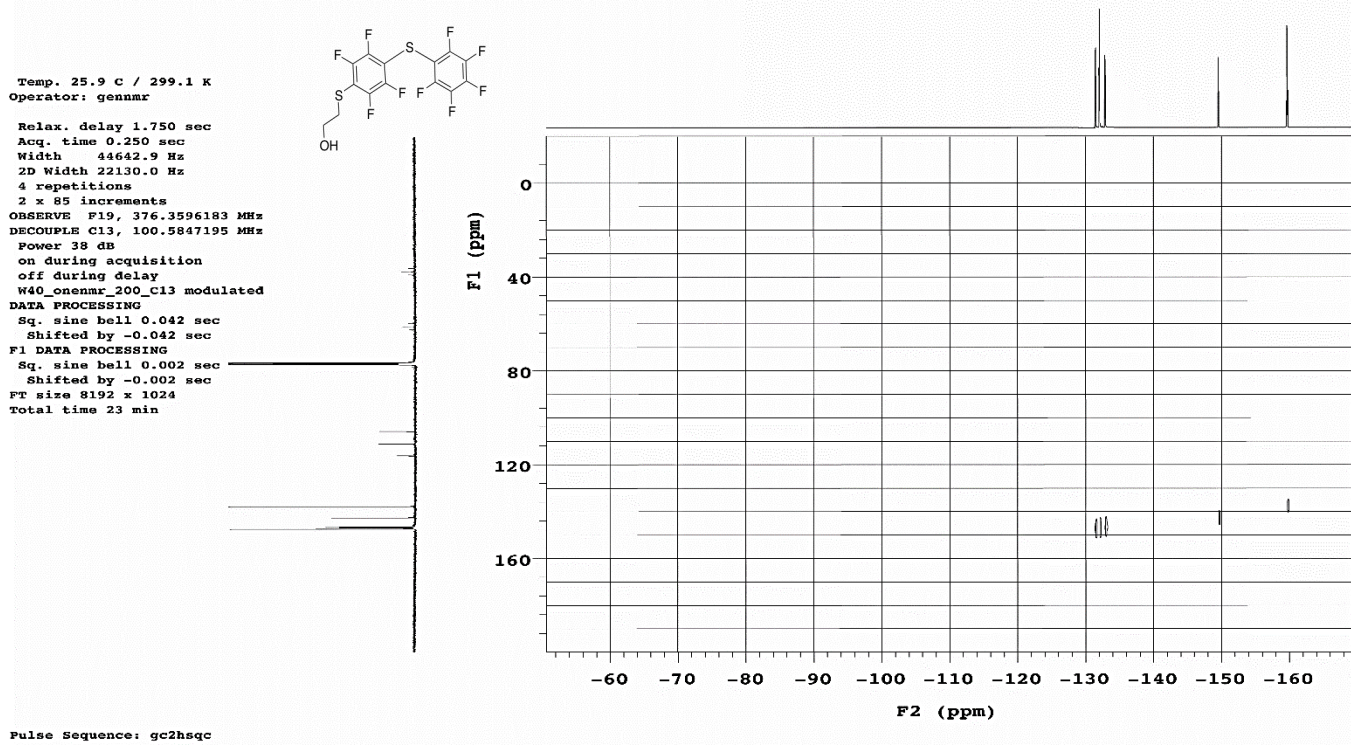

$^{13}\text{C} \{^{19}\text{F}\}$  NMR

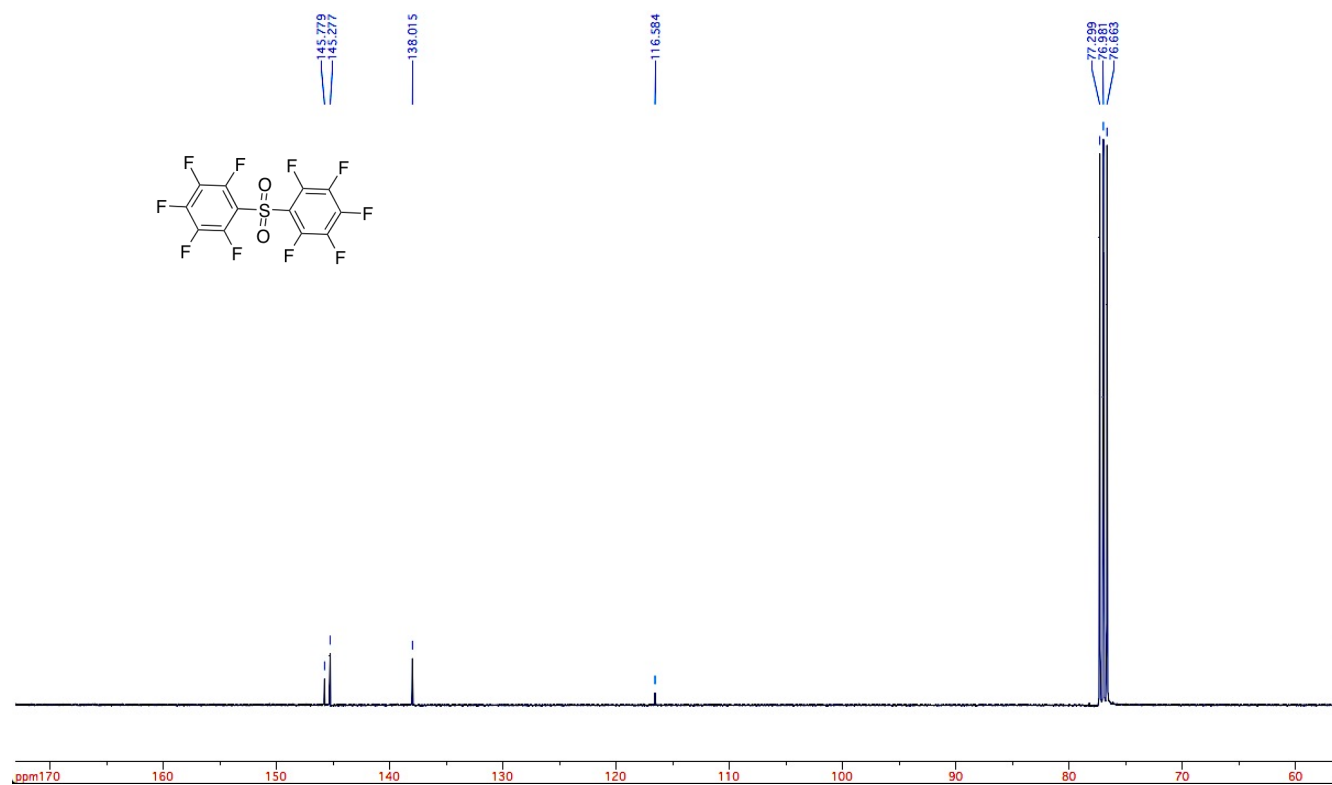

$^{19}\text{F}$  NMR

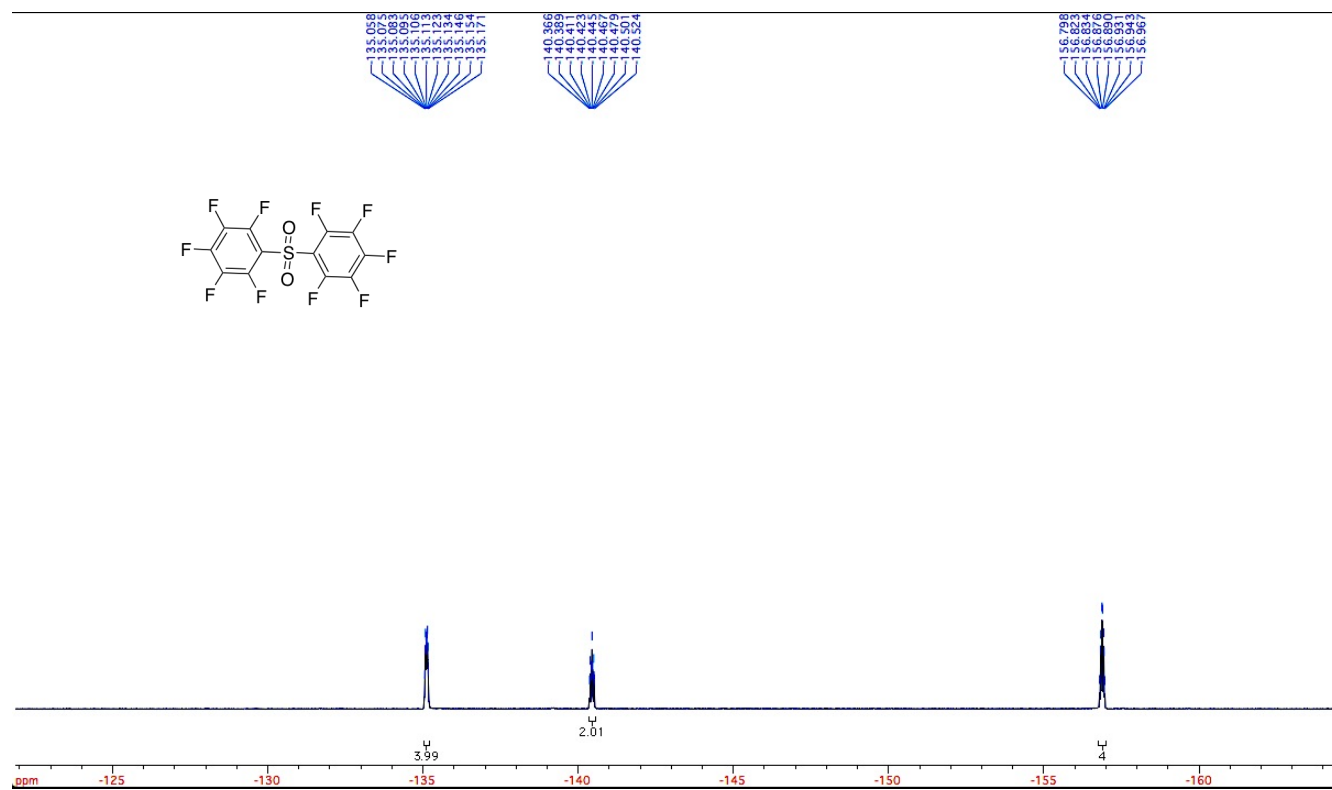

# gHSQC

376.318 MHz F19 gc2hsqc in cdc13, temp 25.9 C -> actual temp = 27.0 C, onenmr probe

Temp. 25.9 C / 299.1 K  
Operator: genmr

Relax. delay 1.750 sec  
Acq. time 0.250 sec  
Width 48076.9 Hz  
2D Width 22130.0 Hz  
4 repetitions  
2 x 85 increments  
OBSERVE F19, 376.3596183 MHz  
DECOUPLE C13, 100.5847195 MHz  
Power 38 dB  
on during acquisition  
off during delay  
W40\_onenmr\_200\_C13 modulated  
DATA PROCESSING  
Sq. sine bell 0.042 sec  
Shifted by -0.042 sec  
F1 DATA PROCESSING  
Sq. sine bell 0.002 sec  
Shifted by -0.002 sec  
FT size 8192 x 1024  
Total time 23 min

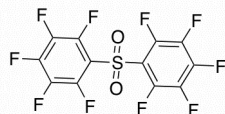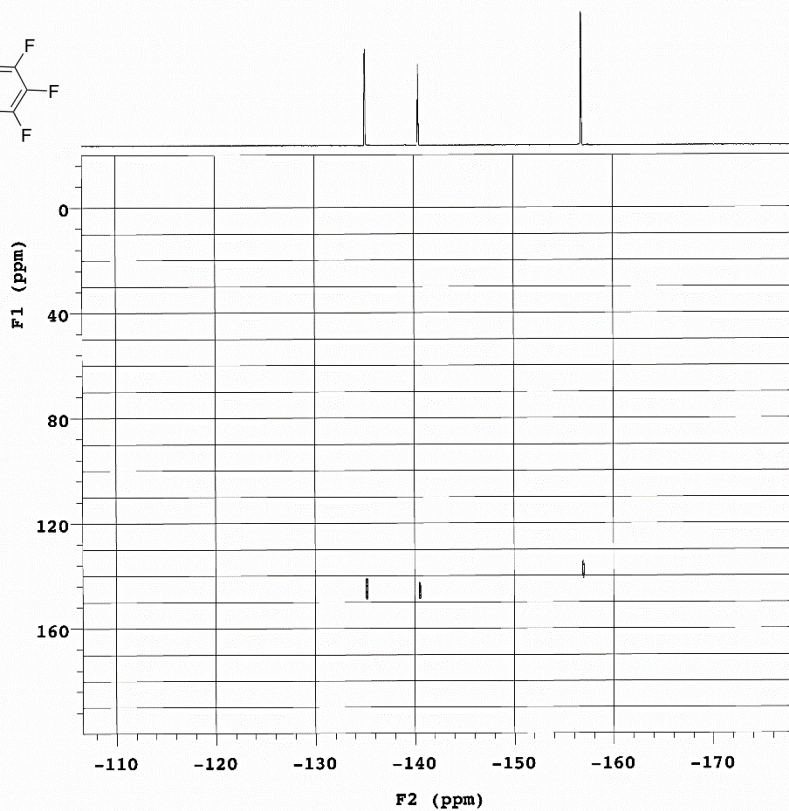

Pulse Sequence: gc2hsqc

# $^1\text{H}$ NMR

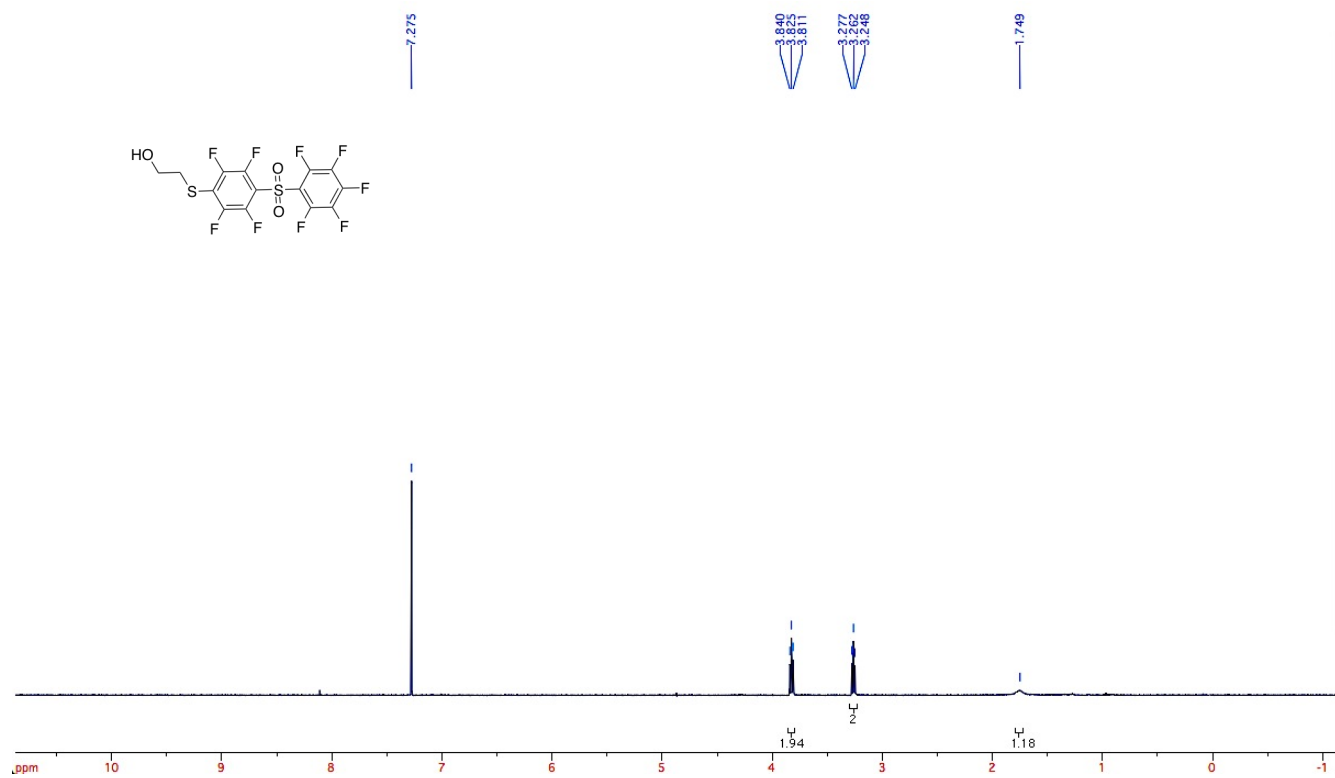

# $^{13}\text{C}\{^{19}\text{F}\}$ NMR

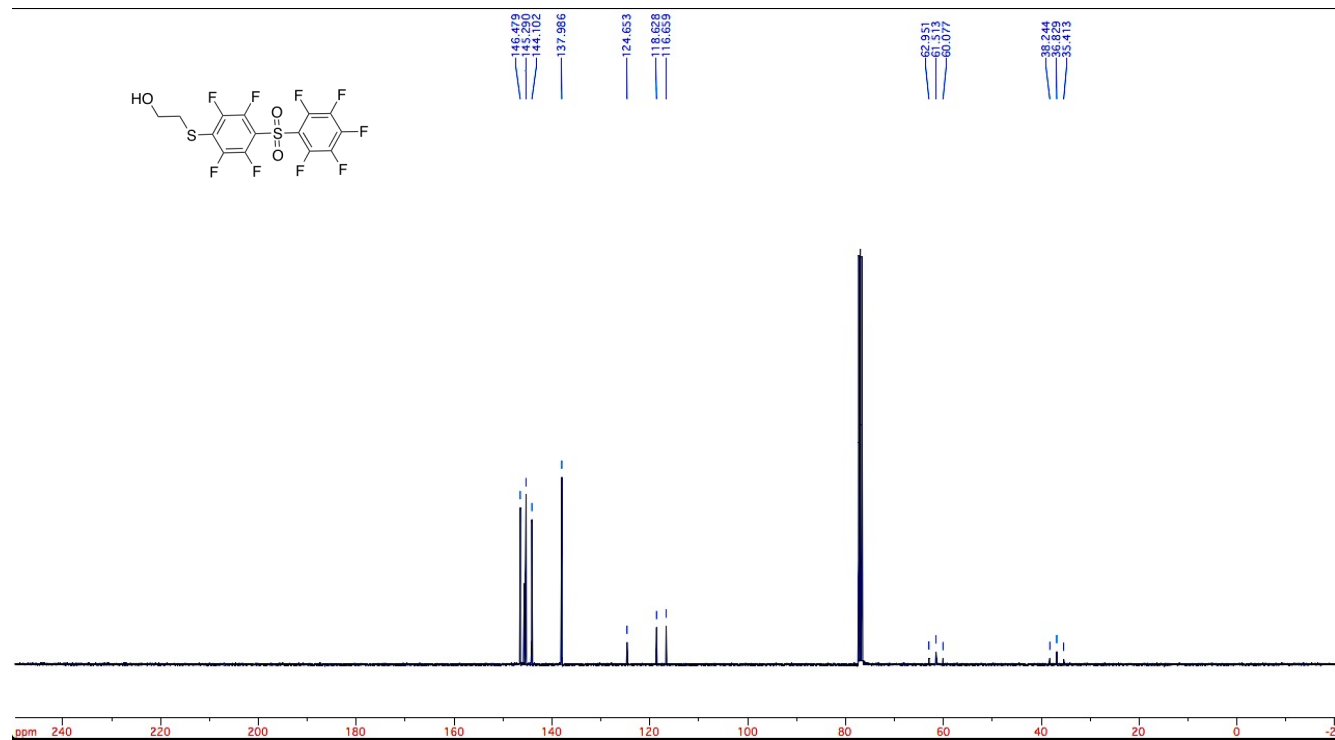

<sup>19</sup>F NMR

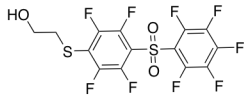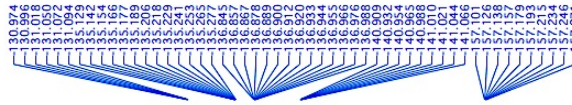

gHSQC

376.318 MHz F19 gc2hsqc in cdcl3, temp 25.9 C -> actual temp = 27.0 C, onenmr probe

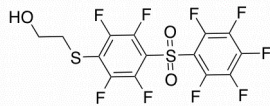

Temp. 25.9 c / 299.1 K  
Operator: gennmr

Relax. delay 1.750 sec  
Acq. time 0.250 sec  
Width 44642.9 Hz  
2D Width 22130.0 Hz  
4 repetitions  
2 x 85 increments  
OBSERVE F19, 376.3596183 MHz  
DECOUPLE C13, 100.5847195 MHz  
Power 38 dB  
on during acquisition  
off during delay  
W40\_onenmr\_200\_C13 modulated  
DATA PROCESSING  
Sq. sine bell 0.042 sec  
Shifted by -0.042 sec  
F1 DATA PROCESSING  
Sq. sine bell 0.002 sec  
Shifted by -0.002 sec  
FT size 8192 x 1024  
Total time 23 min

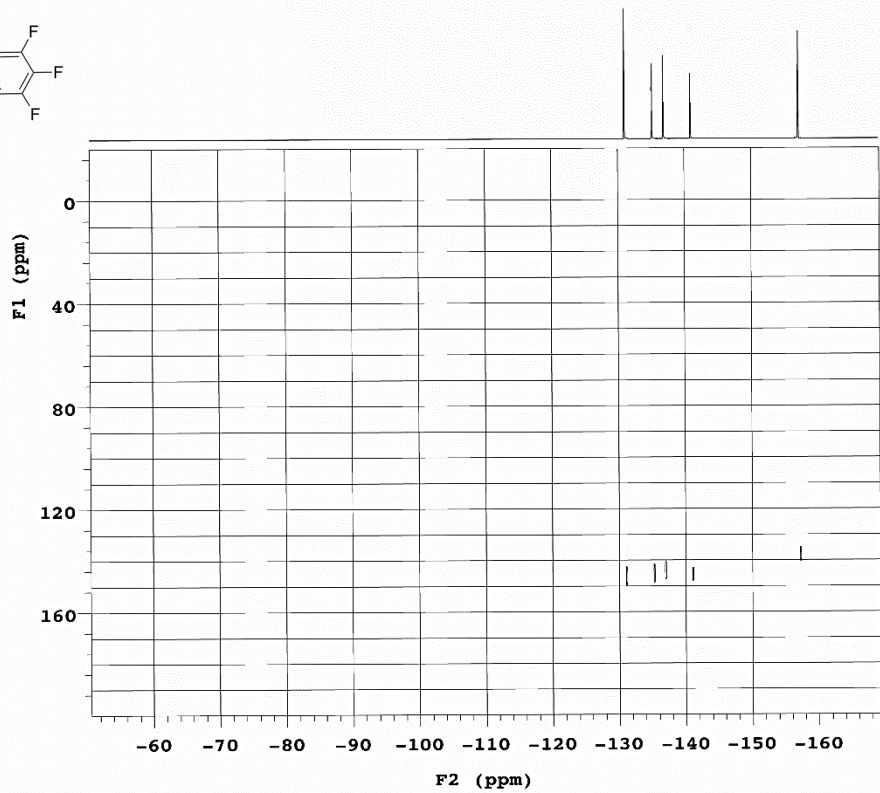

Pulse Sequence: gc2hsqc



# <sup>1</sup>H NMR of peptide SWCAC

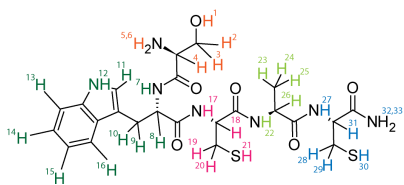

599.929 MHz H1 water\_ES in cd3cn, temp 25.8 C  
 -> actual temp = 27.0 C, autoxid probe

Note:  
 Solvent: H<sub>2</sub>O (0.1% TFA)/CDCN: 1:1  
 Suppression of water peak was achieved by pre-saturation  
 or watergate sequence was used

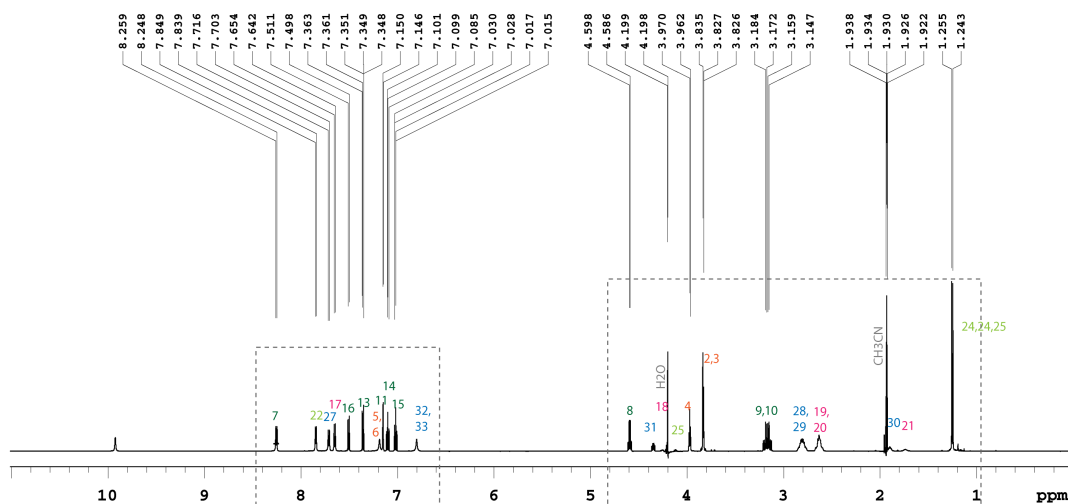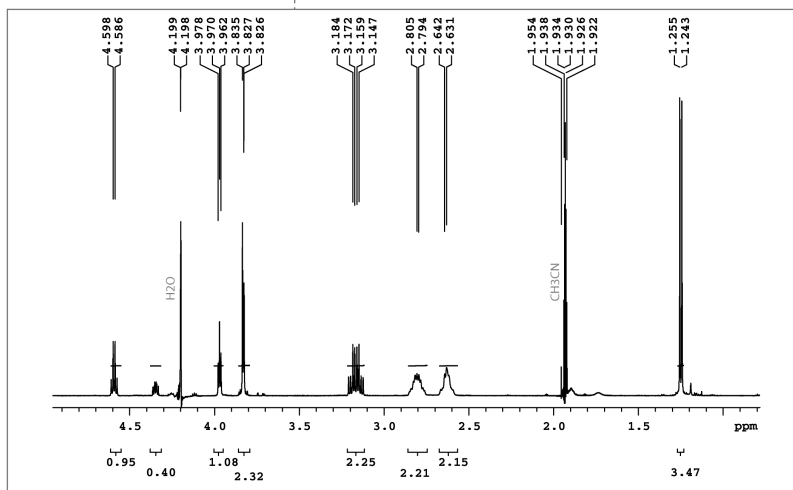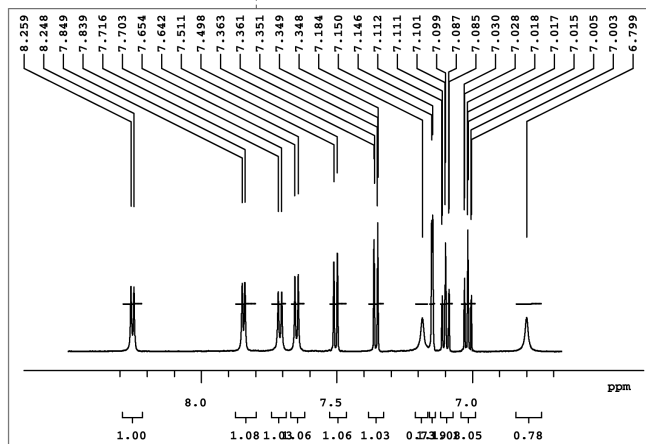

# gmCOSY of peptide SWCAC

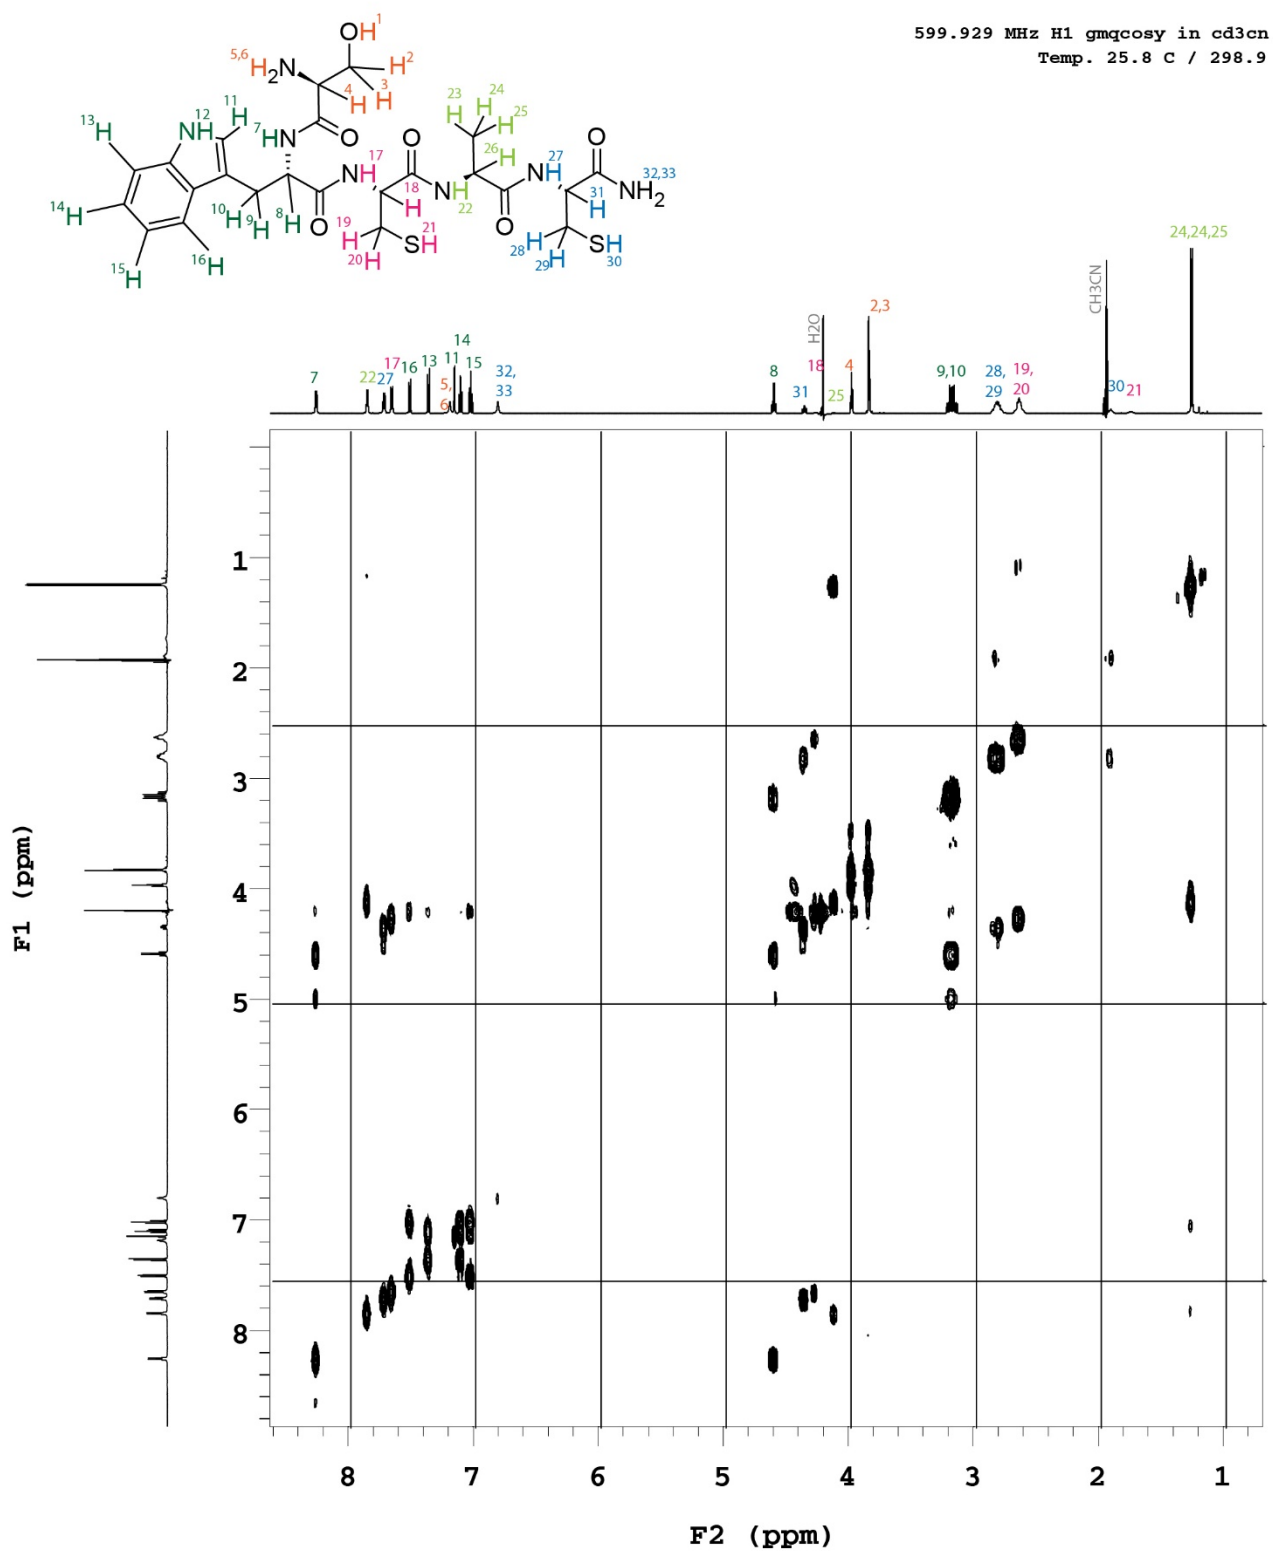

# <sup>1</sup>H NMR of peptide SWCAC-DFS

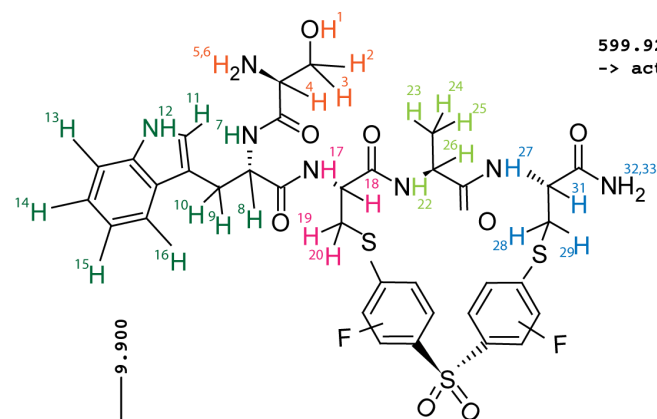

599.929 MHz H1 water\_ES in cd3cn, temp 25.8 C  
 -> actual temp = 27.0 C, autoxid probe

Note:  
 Solvent: H<sub>2</sub>O (0.1% TFA)/CD<sub>3</sub>CN: 1:1  
 Suppression of water peak was achieved by pre-saturation or water-gate sequence was used

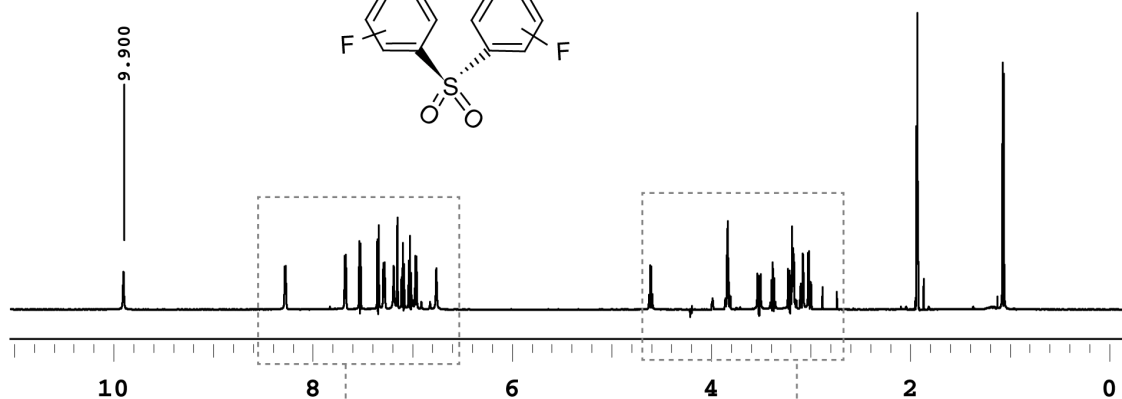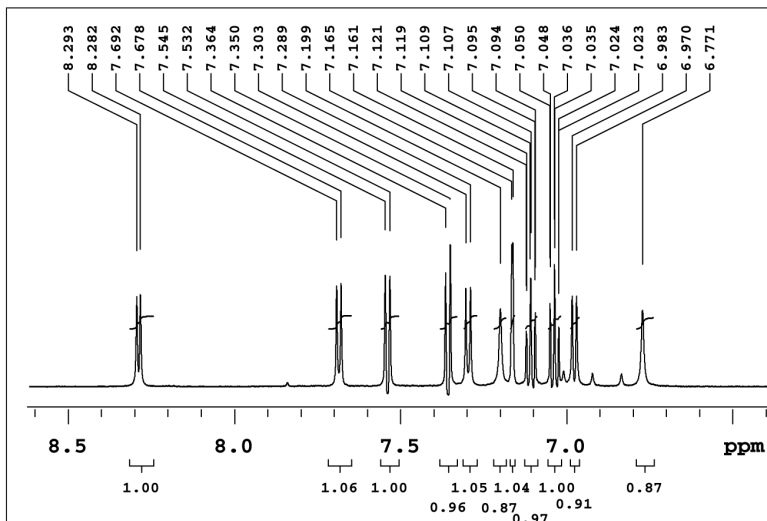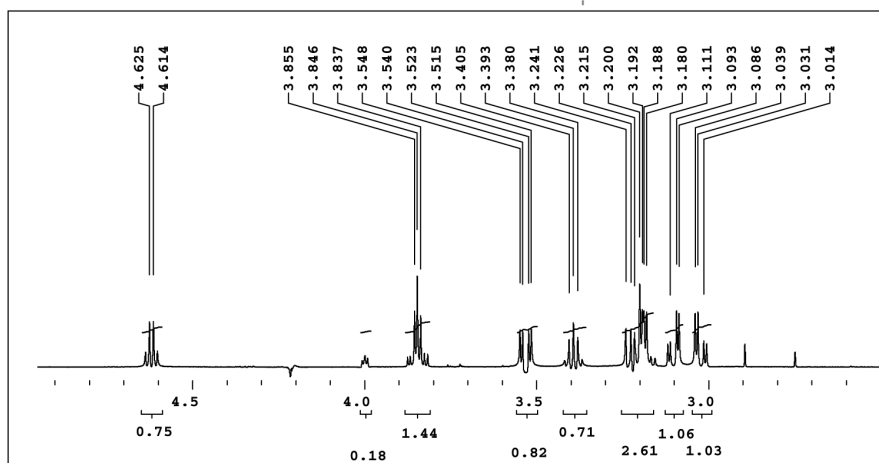

# gmCOSY of peptide SWCAC-DFS

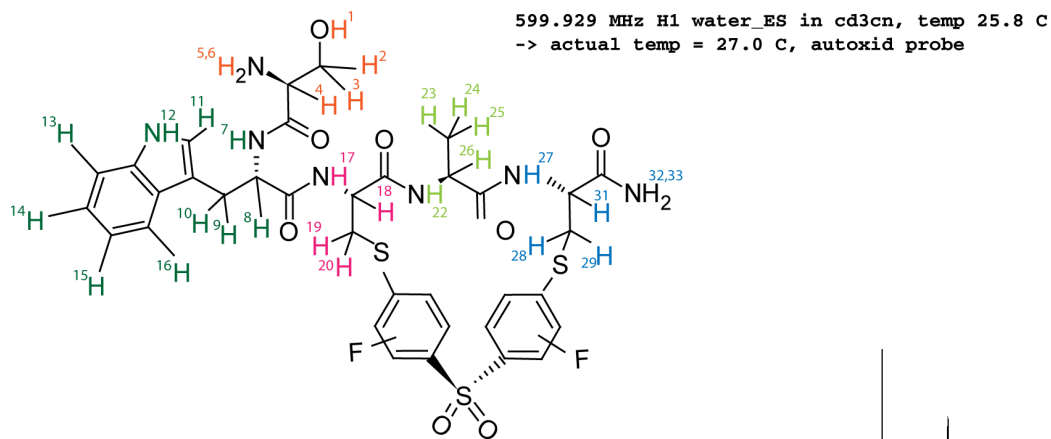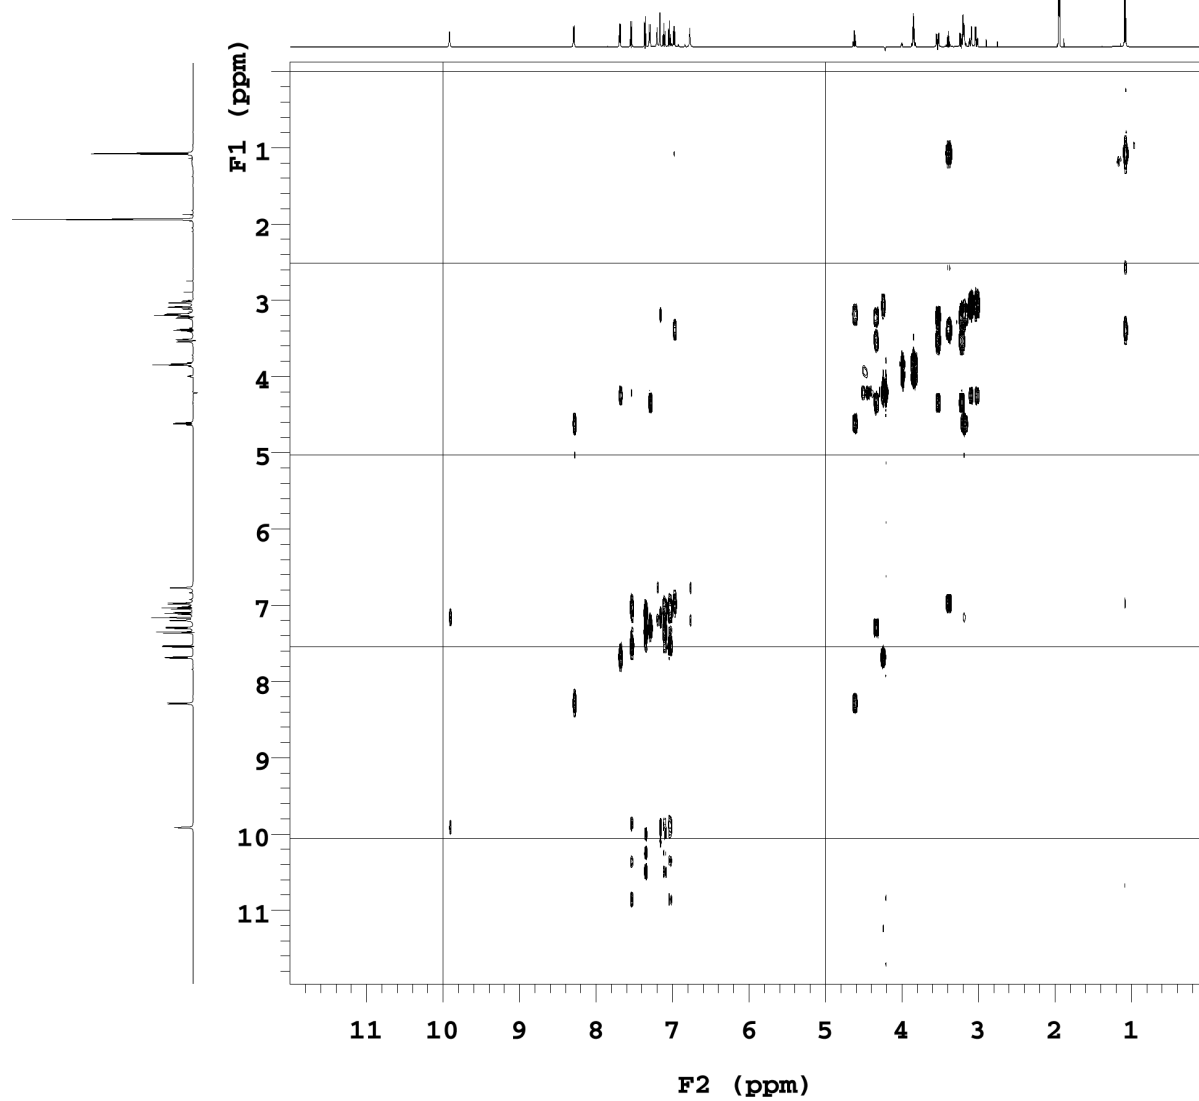

# <sup>1</sup>H NMR of peptide SWCDYRC-Xylene

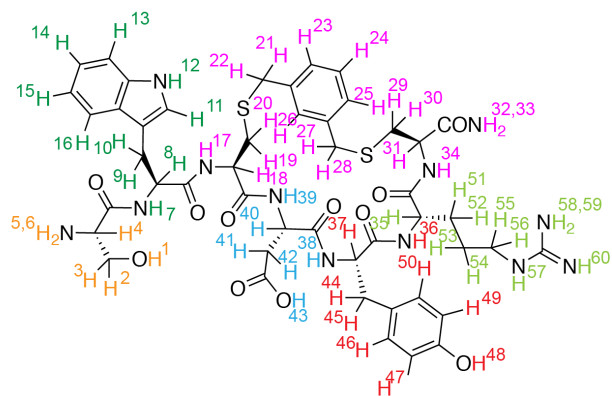

2.423  
Acetonitrile-d<sub>3</sub>

599.929 MHz H1 water\_ES in cd3cn, temp 25.8 C  
-> actual temp = 27.0 C, autoxid probe

Note:  
Solvent: H<sub>2</sub>O (0.1% TFA)/CD<sub>3</sub>CN 1:1  
Suppression of water peak was achieved by  
pre-saturation or watergate sequence was  
used.

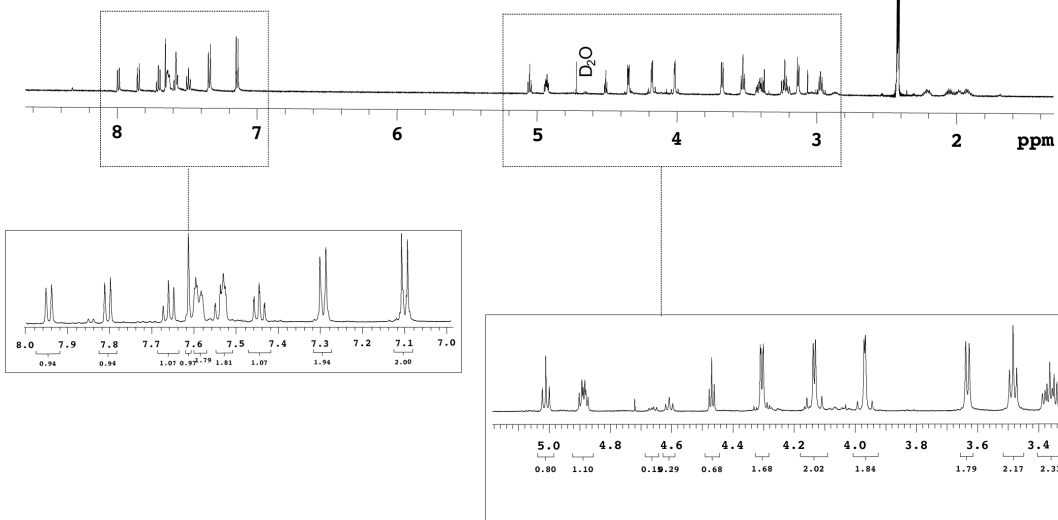

# gmCOSY of peptide SWCDYRC-Xylene

599.929 MHz H1 gmcosy in 1:1 d<sub>2</sub>o: cd<sub>3</sub>n  
Temp. 25.8 C/ 298.9

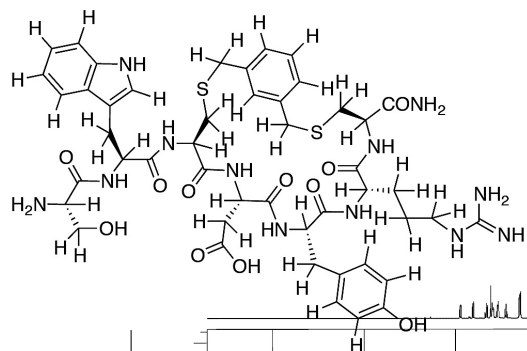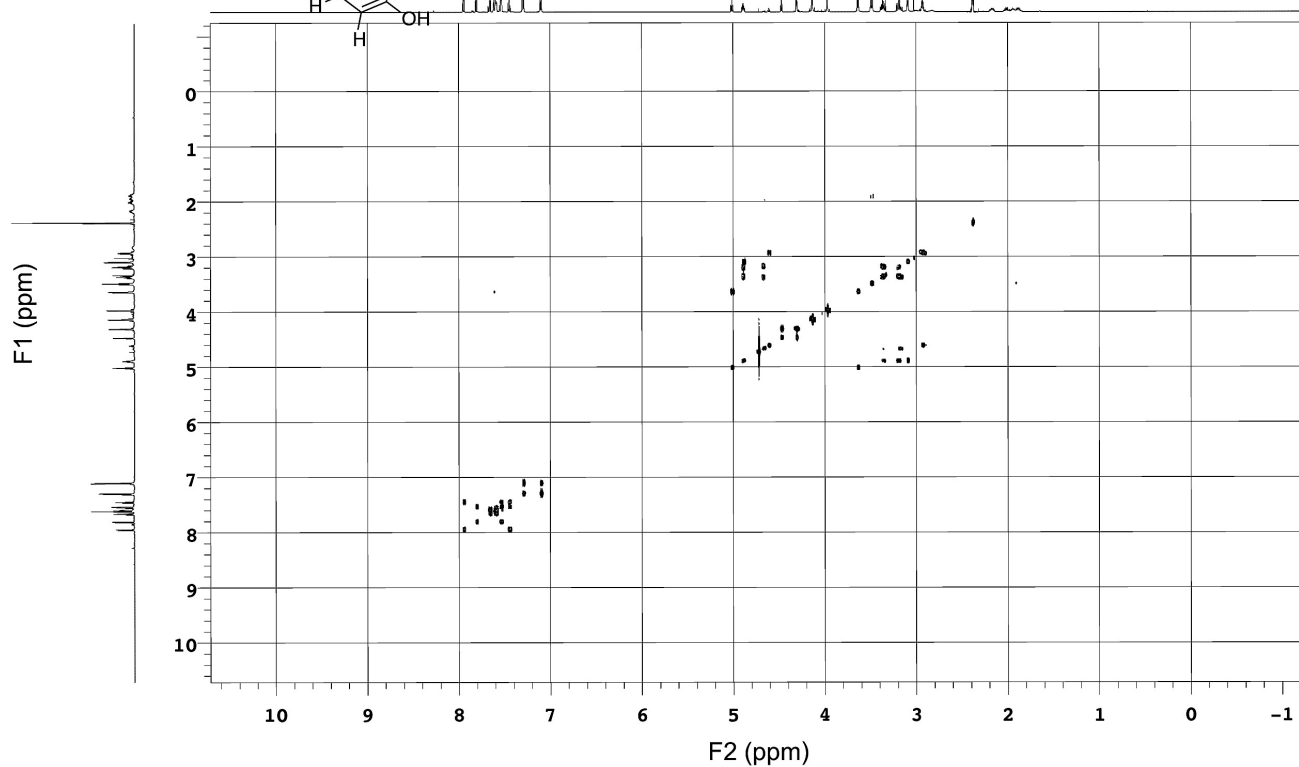

Supplement: SC-007-C5SC03856A-s002.pdf [file SC-007-C5SC03856A-s002.pdf]
